# Supplementary material for: Demographic and clinical characteristics associated with variations in antibody response to BNT162b2 COVID-19 vaccination among healthcare workers at an academic medical centre: a longitudinal cohort analysis
Source: PubMed Central journal article supplement — BMJ Open. 2022 May 23;12(5):e059994. doi: 10.1136/bmjopen-2021-059994 (PMC9130668; doi:10.1136/bmjopen-2021-059994), 2022-05-23
Supplement: bmjopen-2021-059994.draft_revisions.pdf [file bmjopen-2021-059994.draft_revisions.pdf]

# BMJ Open

BMJ Open is committed to open peer review. As part of this commitment we make the peer review history of every article we publish publicly available.

When an article is published we post the peer reviewers' comments and the authors' responses online. We also post the versions of the paper that were used during peer review. These are the versions that the peer review comments apply to.

The versions of the paper that follow are the versions that were submitted during the peer review process. They are not the versions of record or the final published versions. They should not be cited or distributed as the published version of this manuscript.

BMJ Open is an open access journal and the full, final, typeset and author-corrected version of record of the manuscript is available on our site with no access controls, subscription charges or pay-per-view fees (<http://bmjopen.bmj.com>).

If you have any questions on BMJ Open's open peer review process please email [info.bmjopen@bmj.com](mailto:info.bmjopen@bmj.com)

# BMJ Open

## Determinants of the Longitudinal Antibody Response Following Initial mRNA Vaccination

|                               |                                                                                                                                                                                                                                                                                                                                                                                                                                                                                                                                                                                                                                                                                                                                                                                                                                                                                                                                                                                                                                                                                                                                                                                                                                                                                                                                                                                                                                                                                                                                                                                                                                                                                                                                                                                                                                                                                                            |
|-------------------------------|------------------------------------------------------------------------------------------------------------------------------------------------------------------------------------------------------------------------------------------------------------------------------------------------------------------------------------------------------------------------------------------------------------------------------------------------------------------------------------------------------------------------------------------------------------------------------------------------------------------------------------------------------------------------------------------------------------------------------------------------------------------------------------------------------------------------------------------------------------------------------------------------------------------------------------------------------------------------------------------------------------------------------------------------------------------------------------------------------------------------------------------------------------------------------------------------------------------------------------------------------------------------------------------------------------------------------------------------------------------------------------------------------------------------------------------------------------------------------------------------------------------------------------------------------------------------------------------------------------------------------------------------------------------------------------------------------------------------------------------------------------------------------------------------------------------------------------------------------------------------------------------------------------|
| Journal:                      | <i>BMJ Open</i>                                                                                                                                                                                                                                                                                                                                                                                                                                                                                                                                                                                                                                                                                                                                                                                                                                                                                                                                                                                                                                                                                                                                                                                                                                                                                                                                                                                                                                                                                                                                                                                                                                                                                                                                                                                                                                                                                            |
| Manuscript ID                 | bmjopen-2021-059994                                                                                                                                                                                                                                                                                                                                                                                                                                                                                                                                                                                                                                                                                                                                                                                                                                                                                                                                                                                                                                                                                                                                                                                                                                                                                                                                                                                                                                                                                                                                                                                                                                                                                                                                                                                                                                                                                        |
| Article Type:                 | Original research                                                                                                                                                                                                                                                                                                                                                                                                                                                                                                                                                                                                                                                                                                                                                                                                                                                                                                                                                                                                                                                                                                                                                                                                                                                                                                                                                                                                                                                                                                                                                                                                                                                                                                                                                                                                                                                                                          |
| Date Submitted by the Author: | 08-Dec-2021                                                                                                                                                                                                                                                                                                                                                                                                                                                                                                                                                                                                                                                                                                                                                                                                                                                                                                                                                                                                                                                                                                                                                                                                                                                                                                                                                                                                                                                                                                                                                                                                                                                                                                                                                                                                                                                                                                |
| Complete List of Authors:     | <p>Ebinger, Joseph ; Cedars-Sinai Medical Center<br/>         Joung, Sandy; Cedars-Sinai Medical Center<br/>         Liu, Yunxian; Cedars-Sinai Medical Center<br/>         Wu, Min; Cedars-Sinai Medical Center<br/>         Weber, Brittany; Brigham and Women's Hospital<br/>         Claggett, Brian; Brigham and Women's Hospital<br/>         Botting, Patrick; Cedars-Sinai Medical Center<br/>         Sun, Nancy; Cedars-Sinai Medical Center, Smidt Heart Institute<br/>         Driver, Matthew; Cedars-Sinai Medical Center<br/>         Kao, Yu Hung; Cedars-Sinai Medical Center<br/>         Khuu, Briana; Cedars-Sinai Medical Center<br/>         Wynter, Timothy; Cedars-Sinai Medical Center<br/>         Nguyen , Trevor Trung; Cedars-Sinai Medical Center<br/>         Alotaibi, Mona; University of California San Diego<br/>         Prostko, John; Abbott Laboratories<br/>         Frias, Edwin; Abbott Laboratories<br/>         Stewart, James; Abbott Laboratories<br/>         Goodridge, Helen; Cedars-Sinai Medical Center<br/>         Chen, Peter; Cedars-Sinai Medical Center<br/>         Jordan, Stanley; Cedars-Sinai Medical Center<br/>         Jain, Mohit; University of California San Diego<br/>         Sharma , Sonia; La Jolla Institute for Allergy and Immunology<br/>         Fert-Bober, Justyna; Cedars-Sinai Medical Center<br/>         Van Eyk, Jennifer; Cedars-Sinai Medical Center<br/>         Minissian , Margo; Cedars-Sinai Medical Center<br/>         Arditi, Moshe; Cedars-Sinai Medical Center, Division of Pediatric Infectious Diseases<br/>         Melmed, Gil; Cedars-Sinai Medical Center<br/>         Braun, Jonathan; Cedars-Sinai Medical Center<br/>         McGovern, Dermot; Cedars-Sinai Medical Center<br/>         Cheng, Susan; Cedars-Sinai Health System<br/>         Sobhani , Kimia; Cedars-Sinai Medical Center</p> |
| Keywords:                     | COVID-19, Hypertension < CARDIOLOGY, INFECTIOUS DISEASES                                                                                                                                                                                                                                                                                                                                                                                                                                                                                                                                                                                                                                                                                                                                                                                                                                                                                                                                                                                                                                                                                                                                                                                                                                                                                                                                                                                                                                                                                                                                                                                                                                                                                                                                                                                                                                                   |
|                               |                                                                                                                                                                                                                                                                                                                                                                                                                                                                                                                                                                                                                                                                                                                                                                                                                                                                                                                                                                                                                                                                                                                                                                                                                                                                                                                                                                                                                                                                                                                                                                                                                                                                                                                                                                                                                                                                                                            |

1  
2  
3  
4  
5  
6  
7  
8  
9  
10  
11  
12  
13  
14  
15  
16  
17  
18  
19  
20  
21  
22  
23  
24  
25  
26  
27  
28  
29  
30  
31  
32  
33  
34  
35  
36  
37  
38  
39  
40  
41  
42  
43  
44  
45  
46  
47  
48  
49  
50  
51  
52  
53  
54  
55  
56  
57  
58  
59  
60

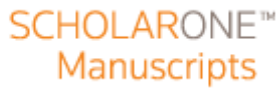

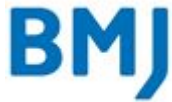

I, the Submitting Author has the right to grant and does grant on behalf of all authors of the Work (as defined in the below author licence), an exclusive licence and/or a non-exclusive licence for contributions from authors who are: i) UK Crown employees; ii) where BMJ has agreed a CC-BY licence shall apply, and/or iii) in accordance with the terms applicable for US Federal Government officers or employees acting as part of their official duties; on a worldwide, perpetual, irrevocable, royalty-free basis to BMJ Publishing Group Ltd ("BMJ") its licensees and where the relevant Journal is co-owned by BMJ to the co-owners of the Journal, to publish the Work in this journal and any other BMJ products and to exploit all rights, as set out in our [licence](#).

The Submitting Author accepts and understands that any supply made under these terms is made by BMJ to the Submitting Author unless you are acting as an employee on behalf of your employer or a postgraduate student of an affiliated institution which is paying any applicable article publishing charge ("APC") for Open Access articles. Where the Submitting Author wishes to make the Work available on an Open Access basis (and intends to pay the relevant APC), the terms of reuse of such Open Access shall be governed by a Creative Commons licence – details of these licences and which [Creative Commons](#) licence will apply to this Work are set out in our licence referred to above.

Other than as permitted in any relevant BMJ Author's Self Archiving Policies, I confirm this Work has not been accepted for publication elsewhere, is not being considered for publication elsewhere and does not duplicate material already published. I confirm all authors consent to publication of this Work and authorise the granting of this licence.

## Determinants of the Longitudinal Antibody Response Following Initial mRNA Vaccination

Joseph E. Ebinger, MD, MS,<sup>1</sup> Sandy Joung, MHDS,<sup>1</sup> Yunxian Liu, PhD,<sup>1</sup> Min Wu, MPH,<sup>1</sup> Brittany Weber, MD, PhD,<sup>2</sup> Brian Claggett, PhD,<sup>2</sup> Patrick G. Botting, MSPH,<sup>1</sup> Nancy Sun, MPS,<sup>1</sup> Matthew Driver, MPH,<sup>1</sup> Yu Hung Kao, BS,<sup>1</sup> Briana Khuu, BS,<sup>1</sup> Timothy Wynter, BS,<sup>1</sup> Trevor-Trung Nguyen, BS,<sup>1</sup> Mona Alotaibi, MD,<sup>3</sup> John C. Prostko, MS,<sup>4</sup> Edwin C. Frias, MBA,<sup>4</sup> James L. Stewart, PhD,<sup>4</sup> Helen S. Goodridge, PhD,<sup>5</sup> Peter Chen, MD,<sup>5</sup> Stanley C. Jordan, MD,<sup>6</sup> Mohit Jain, MD, PhD,<sup>7</sup> Sonia Sharma, PhD,<sup>8</sup> Justyna Fert-Bober, PhD,<sup>1</sup> Jennifer E. Van Eyk, PhD,<sup>1,9</sup> Margo B. Minissian, PhD,<sup>1,10</sup> Moshe Arditi, MD,<sup>11</sup> Gil Y. Melmed, MD,<sup>12</sup> Jonathan G. Braun, MD, PhD,<sup>12,13</sup> Dermot P.B. McGovern, MD, PhD,<sup>12</sup> Susan Cheng, MD, MPH,<sup>1\*</sup> Kimia Sobhani, PhD<sup>13\*</sup>

\*Equal contribution

From the <sup>1</sup>Department of Cardiology, Smidt Heart Institute, Cedars-Sinai Medical Center, Los Angeles, CA, USA; <sup>2</sup>Cardiovascular Division, Brigham and Women's Hospital, Boston, MA, USA; <sup>3</sup>Division of Pulmonary and Critical Care Medicine, University of California, San Diego, San Diego, CA, USA; <sup>4</sup>Applied Research and Technology, Abbott Diagnostics, Abbott Park, IL, USA; <sup>5</sup>Department of Biomedical Sciences, Research Division of Immunology, Cedars-Sinai Medical Center, Los Angeles, CA, USA; <sup>6</sup>Transplant Immunology Laboratory and Comprehensive Transplant Center, Cedars-Sinai Medical Center, Los Angeles, CA, USA; <sup>7</sup>Department of Medicine, School of Medicine, University of California, San Diego, San Diego, CA; <sup>8</sup>La Jolla Institute for Allergy and Immunology, La Jolla, CA, USA; <sup>9</sup>Advanced Clinical Biosystems Institute, Department of Biomedical Sciences, Cedars-Sinai Medical Center, Los Angeles, CA, USA; <sup>10</sup>Brawerman Nursing Institute, Cedars-Sinai Medical Center, Los Angeles, CA, USA; <sup>11</sup>Smidt Heart Institute, Cedars-Sinai Medical Center, Los Angeles, CA, USA; Departments of <sup>12</sup>Pediatrics, Division of Infectious Diseases and Immunology, and Infectious, Immunologic

1  
2  
3 Diseases Research Center (IIDRC), Los Angeles, CA, USA; Department of Biomedical  
4  
5 Sciences, Cedars-Sinai Medical Center, Los Angeles, CA, USA; <sup>12</sup>F. Widjaja Foundation  
6  
7 Inflammatory Bowel and Immunobiology Research Institute, Cedars Sinai, Los Angeles, CA,  
8  
9 USA; <sup>13</sup>Department of Pathology and Laboratory Medicine, Cedars-Sinai Medical Center, Los  
10  
11 Angeles, CA, USA  
12  
13  
14  
15

16 *Corresponding/Guarantors:*

17  
18 Joseph Ebinger, MD, MS, Department of Cardiology, Smidt Heart Institute, Cedars-Sinai  
19  
20 Medical Center, Los Angeles, CA, phone (310) 423-0925, email [joseph.ebinger@csmc.edu](mailto:joseph.ebinger@csmc.edu);

21  
22 Susan Cheng, MD, MPH, Department of Cardiology, Smidt Heart Institute, Cedars-Sinai  
23  
24 Medical Center, Los Angeles, CA, phone (310) 423-2726, email [susan.cheng@cshs.org](mailto:susan.cheng@cshs.org); Kimia

25  
26 Sobhani, PhD, Department of Pathology and Laboratory Medicine, Cedars-Sinai Medical  
27  
28 Center, Los Angeles, CA, phone (310) 423-5405, email [kimia.sobhani@cshs.org](mailto:kimia.sobhani@cshs.org).  
29  
30  
31  
32

33 Wordcount: 2430 words  
34  
35  
36  
37  
38  
39  
40  
41  
42  
43  
44  
45  
46  
47  
48  
49  
50  
51  
52  
53  
54  
55  
56  
57  
58  
59  
60

**ABSTRACT (250-300 words)**

**Objectives.** We sought to understand the demographic and clinical factors associated with variations in longitudinal antibody response following completion of 2-dose regimen of BNT162b2 vaccination.

**Design.** This study is a 10-month longitudinal cohort study of healthcare workers and serially measured anti-spike protein IgG (IgG-S) antibody levels, using mixed linear models to examine their associations with participant characteristics.

**Setting.** Large multi-site academic medical center in Southern California.

**Participants.** A total of 828 healthcare workers met inclusion criteria including completion of an initial two-dose course of BNT162b2 vaccination, complete clinical history and at least 2 blood samples for analysis. Patients had an average age of  $45\pm 13$  years, were 70% female, and 7% with prior SARS-CoV-2 infection.

**Results.** Vaccine induced IgG-S levels remained in the positive range for 99.6% of individuals up to 10 months after initial 2-dose vaccination. Prior SARS-CoV-2 infection was the primary correlate of sustained higher post-vaccination IgG-S levels (partial- $r^2=0.133$ ), with a  $1.74\pm 0.11$  SD higher IgG-S response ( $P<0.001$ ). Female sex ( $P<0.001$ ), younger age ( $P<0.001$ ), and absence of hypertension ( $P=0.041$ ) were also associated with persistently higher IgG-S responses. Notably, prior SARS-CoV-2 infection augmented the associations of sex (interaction  $P=0.033$ ) and modified the associations of hypertension (interaction  $P=0.006$ ), such that infection-naïve individuals with hypertension had persistently lower IgG-S levels ( $P=0.005$ ) whereas prior-infected individuals with hypertension exhibited higher IgG-S levels ( $P=0.06$ ) that remained augmented over time.

**Conclusions.** While the IgG-S antibody response remains in the positive range for up to 10 months following initial mRNA vaccination in most adults, determinants of sustained higher antibody levels include prior SARS-CoV-2 infection, female sex, younger age, and absence of

1  
2  
3 hypertension. Certain determinants of the longitudinal antibody response appear significantly  
4  
5 modified by prior infection status. These findings offer insights regarding factors that may  
6  
7 influence the 'hybrid' immunity conferred by natural infection combined with vaccination.  
8  
9

10  
11 **Keywords**

12  
13 SARS-CoV-2, longitudinal antibody response, sex differences, hypertension  
14  
15  
16  
17  
18  
19  
20  
21  
22  
23  
24  
25  
26  
27  
28  
29  
30  
31  
32  
33  
34  
35  
36  
37  
38  
39  
40  
41  
42  
43  
44  
45  
46  
47  
48  
49  
50  
51  
52  
53  
54  
55  
56  
57  
58  
59  
60

For peer review only



**STRENGTHS AND LIMITATIONS OF THIS STUDY**

- Evaluation of demographic and clinical characteristics associated with variable longitudinal antibody response following BNT162b2 vaccination.
- Among the longest follow up studies of COVID-19 vaccine associated humoral immune response
- Large, diverse study cohort
- Prospective study design
- Assessment of humoral, but not T-cell mediated antibody response

## INTRODUCTION

Exposure to SARS-CoV-2 or its subunits, via natural infection or vaccination, can elicit a humoral immune response that is measurable in the circulation and correlated with relative protection from future infectious disease.<sup>1-4</sup> Recent studies have indicated that this quantifiable humoral response wanes over time – as soon as 3 to 6 months following either natural infection or initial administration of a SARS-CoV-2 vaccination.<sup>5-7</sup> While certain population subsets may experience more or less durable immunity from an initial natural or vaccine exposure, the demographic and clinical characteristics that may influence temporal variations in provoked humoral immune response currently remain unclear.<sup>8</sup>

Given lack of clarity regarding the factors that could promote accelerated versus delayed decline in acquired SARS-CoV-2 immunity, along with concern for immunocompromised persons at the highest risk for opportunistic infections, governments worldwide have made provisions to offer additional ‘booster’ vaccine doses.<sup>9-11</sup> Amidst rollout of the booster vaccinations, there remains equipoise regarding their appropriateness for individuals suspected of having more robust immunity following initial vaccination – including those recovered from prior SARS-CoV-2 infection and younger healthy persons. In fact, emerging data suggest that individuals who have been both fully vaccinated and previously infected with SARS-CoV-2 are likely to benefit from a ‘hybrid immunity’ that offers durable protection from infection in terms of both strength and longevity.<sup>12-15</sup>

To improve our understanding of the longitudinal immune response following initial SARS-CoV-2 vaccination – and the factors associated with variations in this response – we examined the demographic and clinical correlates of anti-spike IgG antibody (IgG-S) levels measured serially in a large cohort of fully vaccinated adults.

## METHODS

### Study Sample

We conducted serial serological assays a longitudinal cohort study of healthcare workers who received vaccination with Pfizer-BioNTech (BNT162b2) at our medical center in Southern California, with study design and sampling procedures detailed previously.<sup>16</sup> Briefly, participants completed surveys on medical history, exposures, and symptoms at baseline and at serial timepoints over the course of the study. History of SARS-CoV-2 infection prior to vaccination was determined based on self-report along with adjudication of medical records and confirmed presence of antibodies targeting the viral nucleocapsid protein [IgG(N)]. Of the total 1,703 healthcare worker participants in the source cohort, we excluded individuals from the current analysis if they did not receive the BNT162b2 vaccine (N=23), their medical history could not be confirmed (N=14), they developed a breakthrough infection any time after first vaccine dose (N=27), or they did not provide at least 2 blood samples for serology following completion of their second vaccine dose (N=796), resulting in a final cohort of 828 individuals (**Supplemental Figure 1** and **Supplemental Table 1**). All participants provided written informed consent for all protocols, which were reviewed and approved by the Cedars-Sinai institutional review board.

### Serology

Serological assays for antibodies to the receptor binding domain (RBD) of the S1 subunit of the viral spike protein [IgG (S-RBD)], and IgG(N) were performed using the Abbott SARS-CoV-2 IgG II assay and SARS-CoV-2 IgG assay, respectively (Abbott Labs, Abbott Park, IL). Antibody levels were measured from plasma samples collected at the following time points: before or up to 3 days after dose 1; within 7 to 21 days after dose 1; within 7 to 21 after dose 2; and then at 8, 16, 24, 32, and 40 weeks after dose 2. We considered an IgG(N) S/C of  $\geq 1.4$  as denoting definitive seropositive status due to prior SARS-CoV-2 exposure based on a previously established thresholds.<sup>17</sup>

## Statistical Analyses

For descriptive statistics, we used analysis of variance to test for differences between continuous normally distributed variables, Kruskal-Wallis rank sum tests for non-normal continuous variables, and chi squared test for categorical variables. We used mixed-effect linear modeling to estimate the mean and 95% confidence interval of log(10)IgG-S levels in relation to time since the date of complete vaccination (i.e. dose 2), with time expressed using natural cubic splines. For longitudinal modeling, we used the AIC to select the optimal number of knots, which was optimized when using 4 knots placed at the 5<sup>th</sup>, 35<sup>th</sup>, 65<sup>th</sup>, and 95<sup>th</sup> percentiles. We treated repeated measures for each participant as random effect and additionally adjusted for age, sex, race, ethnicity, obesity, hypertension, and the Charlson comorbidity index<sup>18</sup> calculated based on the combination of information collected from medical history surveys and the electronic health record.<sup>16 19</sup> In secondary analyses, we repeated multivariable-adjusted mixed-effect regression analyses including multiplicative interaction terms for any significantly associated demographic or clinical variables, to assess for potential effect modification of the anticipated relation between prior SARS-CoV-2 infection on longitudinal log(10)IgG-S trajectory. We conducted all statistical analyses using R (v4.1.1) and considered statistical significance as a two-tailed P value less than 0.05.

## Patient and Public Involvement

Patients and the public were not involved in the development of this study.

## RESULTS

The demographic and clinical characteristics of our study sample are shown in **Supplemental Table 1**. As shown, there were no clinically meaningful differences in age, sex, or clinical comorbidities between individuals with and without prior SARS-CoV-2 infection. All prior infected individuals not only survived the index infection (with only 5% requiring hospitalization), and all were considered to have recovered successfully (without persistent or recurrent symptoms).

In spline analyses of the longitudinal trajectory of response in  $\log(10)\text{IgG-S}$  levels following vaccination, we observed that 99.6% of all healthcare worker participants had repeated values that remained within the positive reference range of  $\geq \log(10)50$  AU/mL over the entire follow-up period of up to 40 weeks (**Figure 1**). In multivariable-adjusted models examining demographic and clinical correlates of longitudinal IgG-S levels, we found that prior SARS-CoV-2 infection was associated with substantially higher antibody levels with prior infected individuals exhibiting an almost 1.7-fold higher standard deviation in  $\log(10)\text{IgG-S}$  levels compared to never infected individuals (**Table 1**). Whereas younger age (below the median cohort age of 42 years) and female sex were also significantly associated with higher IgG-S levels over the duration of the study period (**Table 1**), prior SARS-CoV-2 infection was the predominant determinant with the largest model partial  $r^2$  value of 0.134. These results indicate that 13.4% of the observed variation in longitudinal IgG-S levels was attributable to prior infection status even after accounting for other covariates in the model that include age, sex, race, ethnicity, and the Charlson comorbidity burden index.

In secondary analyses, we found that the interaction between age and prior infection status on longitudinal IgG-S levels was non-significant ( $P=0.45$ , **Figure 2**) although, in exploratory stratified analyses, older age was significantly associated with lower IgG-S response among infection-naïve individuals whereas no significant age-based association was seen in

1  
2  
3 prior-infected individuals (**Supplemental Table 3**). Notably, we observed significant interactions  
4  
5 of male sex with prior infection ( $P=0.033$ ) and of hypertension with prior infection (interaction  
6  
7  $P=0.006$ ). Accordingly, in analyses stratified by prior infection status, male compared to female  
8  
9 sex was associated with greater magnitude of difference in IgG-S level in prior infected (beta -  
10  
11  $0.72$  [se  $0.33$ ],  $P=0.032$ ) compared to never infected individuals (beta  $-0.24$  [se  $0.06$ ],  
12  
13  $P<0.001$ ) (**Supplemental Table 3**); this finding was also demonstrated by longitudinal splines  
14  
15 in **Figure 3**. Notably, as shown in **Figure 4**, presence versus absence of hypertension was  
16  
17 significantly associated with lower IgG-S level in never infected persons (beta  $-0.23$  [se  $0.08$ ],  
18  
19  $P=0.005$ ) while concurrently related to higher IgG-S levels in prior infected individuals (beta  
20  
21  $0.96$  [se  $0.50$ ],  $P=0.06$ ) (**Supplemental Table 3**). Analyses stratified by age, sex, and prior  
22  
23 infection status demonstrated concordant results (**Supplemental Table 4**).  
24  
25  
26  
27  
28  
29  
30  
31  
32  
33  
34  
35  
36  
37  
38  
39  
40  
41  
42  
43  
44  
45  
46  
47  
48  
49  
50  
51  
52  
53  
54  
55  
56  
57  
58  
59  
60

## DISCUSSION

From our study of repeated serological measures performed in a large cohort with two-dose initial BNT162b2 vaccination, there were several key findings. First, we found that the vast majority of adults in our cohort maintained appropriate elevations of IgG-S antibody levels within the positive reference range up to 10 months following initial complete vaccination. Second, the primary differentiator of antibody response trajectory was prior SARS-CoV-2 infection, with a relatively fixed magnitude of variance that lasted throughout the follow up period. Finally, correlates of persistently higher longitudinal antibody response level included female sex, younger age, and absence of hypertension in analyses adjusting for race, ethnicity, and comorbidities. Intriguingly, the longitudinal effect of prior infection status was differentially modified by these associations – particularly sex and hypertension status.

Extending from prior studies,<sup>5,6</sup> we repeated serological measures up to 10 months following initial SARS-CoV-2 vaccination in a large cohort of adults who receive their BNT162b2 vaccinations according to the standardized 2-dose schedule. While observing an initial peak and then steady decline in the absolute levels of IgG-S antibody response, as seen in other studies, we also found a relatively consistent pattern of longitudinal response that almost invariably involved levels remaining in the positive range during the follow-up period. Specifically, we found that the average trajectory of response in IgG-S antibody levels peaks within the first 2 to 8 weeks after the second vaccine dose and then declines towards a relative plateau – seen on the log<sub>10</sub> scale – that lasts up to 40 weeks. Notwithstanding continued reductions in the absolute IgG-S antibody levels, the relative plateau on the log scale signals an attenuation in the rate of decline and is consistent with the longitudinal patterns of post-vaccination antibody titer response that has been reported for other viruses (e.g. influenza) and predicted for SARS-CoV-2.<sup>20-22</sup> Although the threshold of 50 AU/mL for absolute IgG-S antibody levels is validated with 99.5% specificity for detecting antibodies specific to the SARS-CoV-2 spike protein, and

1  
2  
3 the exact quantitative thresholds that may correspond to effective immunity remains unclear, a  
4 relative plateau in the log<sub>10</sub> scale presence of IgG-S offers some assurance of continued  
5 memory B cell activation potentially indicative of an even broader immunological reserve.  
6  
7  
8  
9

10 In addition to the overall trajectory common to most participants, we found that the  
11 primary and persistent differentiator of antibody response trajectory was prior SARS-CoV-2  
12 infection. Extending from prior studies that examined serological responses up to 6 months after  
13 SARS-CoV-2 vaccination,<sup>5</sup> we observed a relatively fixed magnitude of difference in provoked  
14 IgG-S levels – consistently higher in prior infected compared to never infected individuals –  
15 persisting beyond 10 months. The absence of any indication that this difference is narrowing  
16 suggests that the ‘hybrid’ immunity obtained from the combination of natural infection and  
17 vaccination is likely to endure over time – a phenomenon consistent with recent findings of  
18 dynamic memory B cell activation and clonal turnover in individuals exposed to both natural  
19 infection and vaccine.<sup>12</sup> Furthermore, and intriguingly, prior infected individuals had persistently  
20 elevated post-vaccine antibody levels that did not differ by age – indicating minimal influence of  
21 age-related humoral deficiency on the ‘hybrid’ or dose-boosted effect.<sup>23 24</sup> By contrast, the  
22 previously reported female advantage in antibody response to SARS-CoV-2 vaccination<sup>6 25</sup>  
23 appeared accentuated by prior infection such that previously infected females tended to exhibit  
24 the most pronounced as well as persistently elevated antibody response. Females are known to  
25 generate antibody responses to a variety of viral vaccines that are almost twice as high as the  
26 responses seen in males.<sup>26</sup> Augmentation and persistence of this sex difference in the setting of  
27 ‘hybrid’ SARS-CoV-2 exposure points to a female advantage in at least humoral immunity that  
28 could represent a mechanistic contributor to the female advantage seen in COVID-19 related  
29 outcomes.  
30  
31  
32  
33  
34  
35  
36  
37  
38  
39  
40  
41  
42  
43  
44  
45  
46  
47  
48  
49  
50

51  
52 Our results regarding the associations of hypertension with longitudinal antibody  
53 response are especially notable. Extending from prior studies focused on initial post-vaccine  
54  
55  
56  
57  
58  
59  
60



1  
2  
3 effects,<sup>27 28</sup> we found that presence of hypertension was associated with an overall lower level  
4 antibody level response that was consistent over time and persisted for up to 10 months.  
5 Intriguingly, we also found that among persons with prior SARS-CoV-2 infection, the association  
6 of hypertension status on longitudinal IgG-S antibody response was reversed. In effect,  
7 longitudinal antibody levels are profoundly increased among hypertensive participants with prior  
8 COVID-19 compared to without prior COVID-19. Previous studies have demonstrated a more  
9 robust antibody response following native infection among hypertensive individuals – attributed  
10 to a combination of increased sympathetic drive and an underlying inflammatory state serving to  
11 enhance immune activation.<sup>29 30</sup> These same factors have been hypothesized as contributors to  
12 the greater mortality risk seen among hypertensive COVID-19 patients. In light of the lower  
13 antibody response to vaccination seen in hypertensives overall, the paradoxically higher  
14 response seen in hypertensives with prior COVID-19 is similar to the trend seen for older-aged  
15 individuals with prior infection. In both situations, a pre-existing relative deficiency in immune  
16 reserve is superseded by the effects of having been directly exposed to and then recovered  
17 from COVID-19. Importantly, these effects appear to persist in the population over time.  
18  
19  
20  
21  
22  
23  
24  
25  
26  
27  
28  
29  
30  
31  
32  
33  
34

35 Several limitations of this study merit consideration. First, all participants received the  
36 Pfizer-BioNTech (BNT162b2) vaccine, limiting generalizability to other vaccines, although  
37 variable waning of antibody levels following other SARS-CoV-2 vaccines has been described.<sup>8</sup>  
38 There also exists potential bias in the study population, as not all participants provided  
39 longitudinal serology data, although there were negligible clinically meaningful differences  
40 between those with and without adequate serology data for inclusion. Importantly, all prior  
41 infected individuals in our study were not only survivors of COVID-19 but were predominantly  
42 less severely affected with only 5% requiring hospitalizations, all of which lasted less than 5  
43 days, and none reporting continued or recurrent symptoms following recovery from the index  
44 infection. This issue is particularly important to consider when interpreting interaction analyses,  
45  
46  
47  
48  
49  
50  
51  
52  
53  
54  
55  
56  
57  
58  
59  
60

1  
2  
3 as a provoked humoral immune response that is augmented to a level that is sufficient for  
4  
5 countering infection is likely different from an exaggeration in response that may contribute to  
6  
7 end-organ dysfunction or continued symptoms. Furthermore, the average age of our healthcare  
8  
9 worker cohort was relatively younger than that of the general population, even while including a  
10  
11 relatively broad range of ages from 19 to 82 years. Finally, this study was not designed to  
12  
13 assess the extent to which natural infection or vaccine augmented and sustained antibody  
14  
15 levels represent relatively greater immunity against emerging novel SARS-CoV-2 variants. We  
16  
17 also do not address non-humoral related immune protection, which may protect or predispose to  
18  
19 future infections.  
20  
21

22  
23 In summary, our findings indicate that completion of a two-dose mRNA vaccine regimen  
24  
25 provokes an IgG-S antibody response that is not only enhanced but also persistent among  
26  
27 individuals with prior native SARS-CoV-2 infection when compared to those without prior  
28  
29 infection. Further, our results demonstrate potential sex and hypertension specific variations in  
30  
31 the longitudinal response to single vs dual antigenic exposure that may guide more tailored  
32  
33 assessments of individual-level risks for future infection. In particular, the role of hypertension as  
34  
35 a potential potent modifier of antibody response, with divergent post-vaccination effects  
36  
37 between those with and without prior infection, may reflect key differences in physiologically  
38  
39 mediated immune response among those with and without high blood pressure. These findings  
40  
41 may allow for allocation of still limited vaccine resources by targeting individuals most likely to  
42  
43 benefit from additional vaccine doses.  
44  
45  
46  
47  
48  
49  
50  
51  
52  
53  
54  
55  
56  
57  
58  
59  
60

## CONTRIBUTORSHIP STATEMENT

JEE contributed via Conceptualization, Methodology, Validation, Formal Analysis, Investigation, Data Curation, Writing - Original Draft, Writing - Review & Editing, Visualization, and Project Administration. SJ contributed via Conceptualization, Resources, Data Curation, and Writing - Review & Editing. YL and MW contributed via Methodology, Formal Analysis, Writing - Original Draft, Writing - Review & Editing, and Visualization. BW, YHK, BK, TW, TTN, and MA contributed via Resources and Data Curation. BC contributed via Formal Analysis, Writing - Review & Editing, and Supervision. PGB, NS, and MD contributed via Validation, Investigation, and Writing - Review & Editing. JCP contributed via Methodology, Investigation, and Writing - Review & Editing. ECF contributed via Investigation and Resources. JLS, HSG, PC, and SCJ, contributed via Investigation, Resources, and Writing - Review & Editing. MJ contributed via Investigation, Resources, Writing - Review & Editing, and Funding Acquisition. SS, JFB, JEVE, MBM, MA, and GYM contributed via Investigation and Writing - Review & Editing. JGB contributed via Investigation, Writing - Review & Editing, Project Administration, and Funding Acquisition. DPBM contributed via Investigation, Writing - Review & Editing, and Project Administration. SC and KS Conceptualization, Methodology, Validation, Formal Analysis, Investigation, Data Curation, Writing - Original Draft, Writing - Review & Editing, Visualization, Supervision, Project Administration, and Funding Acquisition. The corresponding authors attest that all listed authors meet authorship criteria and that no others meeting the criteria have been omitted.

## CONFLICTS OF INTEREST

JCP, ECF, and JLS work for Abbott Diagnostics, a company that performed the serological assays on the biospecimens that were collected for this study. The remaining authors have no disclosures to report.

## FUNDING

This work was supported by the Erika J Glazer Family Foundation (no award number), F. Widjaja Family Foundation (no award number), Helmsley Charitable Trust (no award number), and NIH grants U54-CA260591, U54-AG065141, and K23-HL153888. Funders had no role in study design, data collection, data analysis, data interpretation, or writing of the report.

## ETHICS APPROVAL

This study was approved by the Cedars-Sinai Institutional Review Board (IRB) (CORALE Study00000621). All participants provided written informed consent for all protocols.

## DATA SHARING

Due to the sensitive nature of the data collected for this study, requests to access the dataset from qualified researchers trained in protocols on the protection of human subjects may be sent to Cedars-Sinai Medical Center at [biodatacore@cshs.org](mailto:biodatacore@cshs.org). The manuscript's guarantors (JEE, SC, KS) affirm that this manuscript is an honest, accurate, and transparent account of the study being reported; that no important aspects of the study have been omitted; and that any discrepancies from the study as planned have been explained.

## ACKNOWLEDGEMENTS

We are grateful to all the front-line healthcare workers in our healthcare system who continue to be dedicated to delivering the highest quality care for all patients, as well as the invaluable contributions of the CORALE and EMBARC study investigators and staff.

**REFERENCES**

1. Khoury DS, Cromer D, Reynaldi A, et al. Neutralizing antibody levels are highly predictive of immune protection from symptomatic SARS-CoV-2 infection. *Nat Med* 2021;27(7):1205-11. doi: 10.1038/s41591-021-01377-8 [published Online First: 2021/05/19]
2. Edara VV, Norwood C, Floyd K, et al. Infection- and vaccine-induced antibody binding and neutralization of the B.1.351 SARS-CoV-2 variant. *Cell Host Microbe* 2021;29(4):516-21 e3. doi: 10.1016/j.chom.2021.03.009 [published Online First: 2021/04/03]
3. Corbett KS, Nason MC, Flach B, et al. Immune correlates of protection by mRNA-1273 vaccine against SARS-CoV-2 in nonhuman primates. *Science* 2021;373(6561):eabj0299. doi: 10.1126/science.abj0299 [published Online First: 2021/09/17]
4. Bergwerk M, Gonen T, Lustig Y, et al. Covid-19 Breakthrough Infections in Vaccinated Health Care Workers. *N Engl J Med* 2021;385(16):1474-84. doi: 10.1056/NEJMoa2109072 [published Online First: 2021/07/29]
5. Zhong D, Xiao S, Debes AK, et al. Durability of Antibody Levels After Vaccination With mRNA SARS-CoV-2 Vaccine in Individuals With or Without Prior Infection. *JAMA* 2021 doi: 10.1001/jama.2021.19996
6. Levin EG, Lustig Y, Cohen C, et al. Waning Immune Humoral Response to BNT162b2 Covid-19 Vaccine over 6 Months. *New England Journal of Medicine* 2021 doi: 10.1056/NEJMoa2114583

- 1  
2  
3 7. Roltgen K, Powell AE, Wirz OF, et al. Defining the features and duration of antibody  
4  
5 responses to SARS-CoV-2 infection associated with disease severity and outcome. *Sci*  
6  
7 *Immunol* 2020;5(54):eabe0240. doi: 10.1126/sciimmunol.abe0240 [published Online  
8  
9 First: 2020/12/09]  
10  
11
- 12 8. Shrotri M, Navaratnam AMD, Nguyen V, et al. Spike-antibody waning after second dose of  
13  
14 BNT162b2 or ChAdOx1. *Lancet* 2021;398(10298):385-87. doi: 10.1016/S0140-  
15  
16 6736(21)01642-1 [published Online First: 2021/07/19]  
17  
18
- 19 9. Janeway CA Jr TP, Walport M, et al. Immunobiology: The Immune System in Health and  
20  
21 Disease. 5th Edition ed. New York: Garland Science 2001.  
22  
23
- 24 10. Bar-On YM, Goldberg Y, Mandel M, et al. Protection of BNT162b2 Vaccine Booster against  
25  
26 Covid-19 in Israel. *N Engl J Med* 2021;385(15):1393-400. doi: 10.1056/NEJMoa2114255  
27  
28 [published Online First: 2021/09/16]  
29  
30
- 31 11. CDC Statement on ACIP Booster Recommendations: Centers for Disease Control and  
32  
33 Prevention, 2021.  
34  
35
- 36 12. Wang Z, Muecksch F, Schaefer-Babajew D, et al. Naturally enhanced neutralizing breadth  
37  
38 against SARS-CoV-2 one year after infection. *Nature* 2021;595(7867):426-31. doi:  
39  
40 10.1038/s41586-021-03696-9 [published Online First: 2021/06/15]  
41  
42  
43
- 44 13. Cho A, Muecksch F, Schaefer-Babajew D, et al. Anti-SARS-CoV-2 receptor binding domain  
45  
46 antibody evolution after mRNA vaccination. *Nature* 2021 doi: 10.1038/s41586-021-  
47  
48 04060-7 [published Online First: 2021/10/08]  
49  
50
- 51 14. Crotty S. Hybrid immunity. *Science* 2021;372(6549):1392-93. doi: 10.1126/science.abj2258  
52  
53  
54  
55  
56  
57  
58

- 1  
2  
3 15. Stamatatos L, Czartoski J, Wan YH, et al. mRNA vaccination boosts cross-variant  
4 neutralizing antibodies elicited by SARS-CoV-2 infection. *Science* 2021 doi:  
5 10.1126/science.abg9175 [published Online First: 2021/03/27]  
6  
7  
8  
9  
10 16. Ebinger JE, Botwin GJ, Albert CM, et al. Seroprevalence of antibodies to SARS-CoV-2 in  
11 healthcare workers: a cross-sectional study. *BMJ Open* 2021;11(2):e043584. doi:  
12 10.1136/bmjopen-2020-043584 [published Online First: 2021/02/14]  
13  
14  
15  
16  
17 17. SARS-CoV-2 IgG II Quant Assay - Instructions for Use - FDA  
18 (<https://www.fda.gov/media/137383/download>). 6S60: Abbott Laboratories, Diagnostics  
19 Division, December 2020.  
20  
21  
22  
23  
24 18. Charlson ME, Pompei P, Ales KL, et al. A new method of classifying prognostic comorbidity  
25 in longitudinal studies: development and validation. *J Chronic Dis* 1987;40(5):373-83.  
26 doi: 10.1016/0021-9681(87)90171-8 [published Online First: 1987/01/01]  
27  
28  
29  
30  
31 19. Ebinger JE, Fert-Bober J, Printsev I, et al. Antibody responses to the BNT162b2 mRNA  
32 vaccine in individuals previously infected with SARS-CoV-2. *Nat Med* 2021;27(6):981-  
33 84. doi: 10.1038/s41591-021-01325-6 [published Online First: 2021/04/03]  
34  
35  
36  
37  
38 20. Clapham H, Hay J, Routledge I, et al. Seroepidemiologic Study Designs for Determining  
39 SARS-COV-2 Transmission and Immunity. *Emerg Infect Dis* 2020;26(9):1978-86. doi:  
40 10.3201/eid2609.201840 [published Online First: 2020/06/17]  
41  
42  
43  
44  
45 21. Young BE, Mak TM, Ang LW, et al. Influenza vaccine failure in the tropics: a retrospective  
46 cohort study of waning effectiveness. *Epidemiol Infect* 2020;148:e299. doi:  
47 10.1017/s0950268820002952 [published Online First: 2020/12/03]  
48  
49  
50  
51  
52  
53  
54  
55  
56  
57  
58  
59  
60

- 1  
2  
3 22. Zhao X, Ning Y, Chen MI-C, et al. Individual and Population Trajectories of Influenza  
4  
5 Antibody Titers Over Multiple Seasons in a Tropical Country. *American Journal of*  
6  
7 *Epidemiology* 2017;187(1):135-43. doi: 10.1093/aje/kwx201  
8  
9
- 10 23. Richards NE, Keshavarz B, Workman LJ, et al. Comparison of SARS-CoV-2 Antibody  
11  
12 Response by Age Among Recipients of the BNT162b2 vs the mRNA-1273 Vaccine.  
13  
14 *JAMA Netw Open* 2021;4(9):e2124331. doi: 10.1001/jamanetworkopen.2021.24331  
15  
16 [published Online First: 2021/09/03]  
17  
18
- 19 24. Collier DA, Ferreira I, Kotagiri P, et al. Age-related immune response heterogeneity to  
20  
21 SARS-CoV-2 vaccine BNT162b2. *Nature* 2021;596(7872):417-22. doi: 10.1038/s41586-  
22  
23 021-03739-1 [published Online First: 2021/07/01]  
24  
25  
26
- 27 25. Demonbreun AR, Sancilio A, Velez ME, et al. COVID-19 mRNA Vaccination Generates  
28  
29 Greater Immunoglobulin G Levels in Women Compared to Men. *J Infect Dis*  
30  
31 2021;224(5):793-97. doi: 10.1093/infdis/jiab314 [published Online First: 2021/06/13]  
32  
33
- 34 26. Flanagan KL, Fink AL, Plebanski M, et al. Sex and Gender Differences in the Outcomes of  
35  
36 Vaccination over the Life Course. *Annu Rev Cell Dev Biol* 2017;33:577-99. doi:  
37  
38 10.1146/annurev-cellbio-100616-060718 [published Online First: 2017/10/11]  
39  
40  
41
- 42 27. Lustig Y, Sapir E, Regev-Yochay G, et al. BNT162b2 COVID-19 vaccine and correlates of  
43  
44 humoral immune responses and dynamics: a prospective, single-centre, longitudinal  
45  
46 cohort study in health-care workers. *The Lancet Respiratory Medicine* 2021;9(9):999-  
47  
48 1009. doi: [https://doi.org/10.1016/S2213-2600\(21\)00220-4](https://doi.org/10.1016/S2213-2600(21)00220-4)  
49  
50
- 51 28. Singh AK, Phatak SR, Singh R, et al. Antibody response after first and second-dose of  
52  
53 ChAdOx1-nCOV (Covishield™) and BBV-152 (Covaxin™) among health care  
54  
55 workers in India: The final results of cross-sectional coronavirus vaccine-induced  
56  
57  
58  
59  
60



1  
2  
3 antibody titre (COVAT) study. *Vaccine* 2021;39(44):6492-509. doi:

4  
5 <https://doi.org/10.1016/j.vaccine.2021.09.055>  
6  
7

8 29. Sereti E, Stamatelopoulos KS, Zakopoulos NA, et al. Hypertension: An immune related  
9 disorder? *Clinical Immunology* 2020;212:108247. doi:

10  
11 <https://doi.org/10.1016/j.clim.2019.108247>  
12  
13  
14

15 30. Singh MV, Chapleau MW, Harwani SC, et al. The immune system and hypertension.  
16

17 *Immunol Res* 2014;59(1-3):243-53. doi: 10.1007/s12026-014-8548-6  
18  
19  
20  
21  
22  
23  
24  
25  
26  
27  
28  
29  
30  
31  
32  
33  
34  
35  
36  
37  
38  
39  
40  
41  
42  
43  
44  
45  
46  
47  
48  
49  
50  
51  
52  
53  
54  
55  
56  
57  
58  
59  
60

**Table 1. Clinical and demographic correlates of longitudinal anti-spike IgG antibody response following complete initial mRNA vaccination.**

|                            | Beta* | SE   | P      | Partial r <sup>2</sup> |
|----------------------------|-------|------|--------|------------------------|
| Prior SARS-CoV-2 infection | 1.74  | 0.11 | <0.001 | 0.134                  |
| Age, year                  | -0.01 | 0.00 | <0.001 | 0.016                  |
| Male sex                   | -0.27 | 0.06 | <0.001 | 0.013                  |
| Non-white race             | -0.00 | 0.06 | 0.99   | 0.000                  |
| Hispanic ethnicity         | 0.02  | 0.10 | 0.80   | 0.000                  |
| Obesity                    | 0.03  | 0.09 | 0.77   | 0.000                  |
| Hypertension               | -0.17 | 0.08 | 0.041  | 0.003                  |
| Charlson comorbidity index | -0.02 | 0.03 | 0.56   | 0.000                  |

\*Beta values represent increase in 1-SD of log(10)IgG-S level per presence (vs absence) of a categorical variable or per unit increment of continuous variable).

1  
2  
3 **Figure 1. Longitudinal trajectory of IgG-S antibody levels following completed BNT162b2**  
4 **vaccination.** Multivariable-adjusted longitudinal trajectories are shown for individuals with a  
5 history of prior COVID-19 infection (orange line) for those without prior COVID-19 infection  
6 (green line). Longitudinal estimates with 95% confidence limits (shaded areas) are adjusted for  
7 age, sex, and hypertension.  
8  
9  
10  
11  
12

13  
14  
15 **Figure 2. Longitudinal trajectory of IgG-S antibody levels following completed BNT162b2**  
16 **vaccination by prior infection status and age.** Multivariable-adjusted longitudinal trajectories  
17 are shown for individuals with a history of prior COVID-19 infection for those without prior  
18 COVID-19 infection, including an interaction for age (above vs below median cohort age).  
19 Longitudinal estimates with 95% confidence limits (shaded areas) are adjusted for sex and  
20 hypertension.  
21  
22  
23  
24  
25  
26  
27  
28  
29

30 **Figure 3. Longitudinal trajectory of IgG-S antibody levels following completed BNT162b2**  
31 **vaccination by prior infection status and sex.** Multivariable-adjusted longitudinal trajectories  
32 are shown for individuals with a history of prior COVID-19 infection for those without prior  
33 COVID-19 infection, including an interaction for sex. Longitudinal estimates with 95%  
34 confidence limits (shaded areas) are adjusted for age and hypertension.  
35  
36  
37  
38  
39  
40  
41  
42

43 **Figure 4. Longitudinal trajectory of IgG-S antibody levels following completed BNT162b2**  
44 **vaccination by prior infection and hypertension status.** Multivariable-adjusted longitudinal  
45 trajectories are shown for individuals with a history of prior COVID-19 infection for those without  
46 prior COVID-19 infection, including an interaction for sex. Longitudinal estimates with 95%  
47 confidence limits (shaded areas) are adjusted for age and sex.  
48  
49  
50  
51  
52  
53  
54  
55  
56  
57  
58  
59  
60

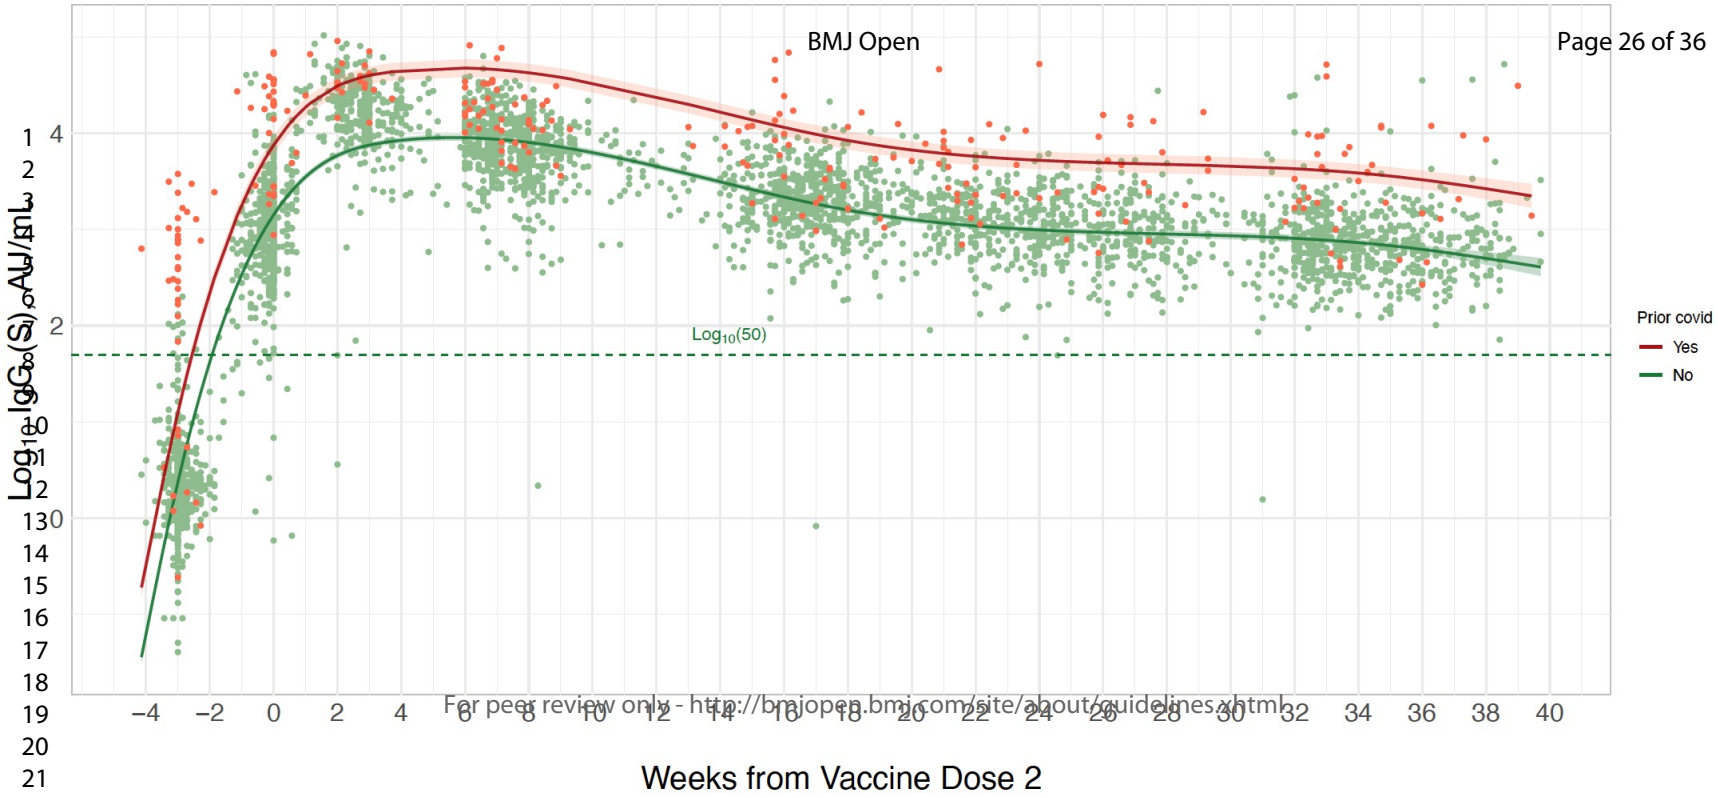

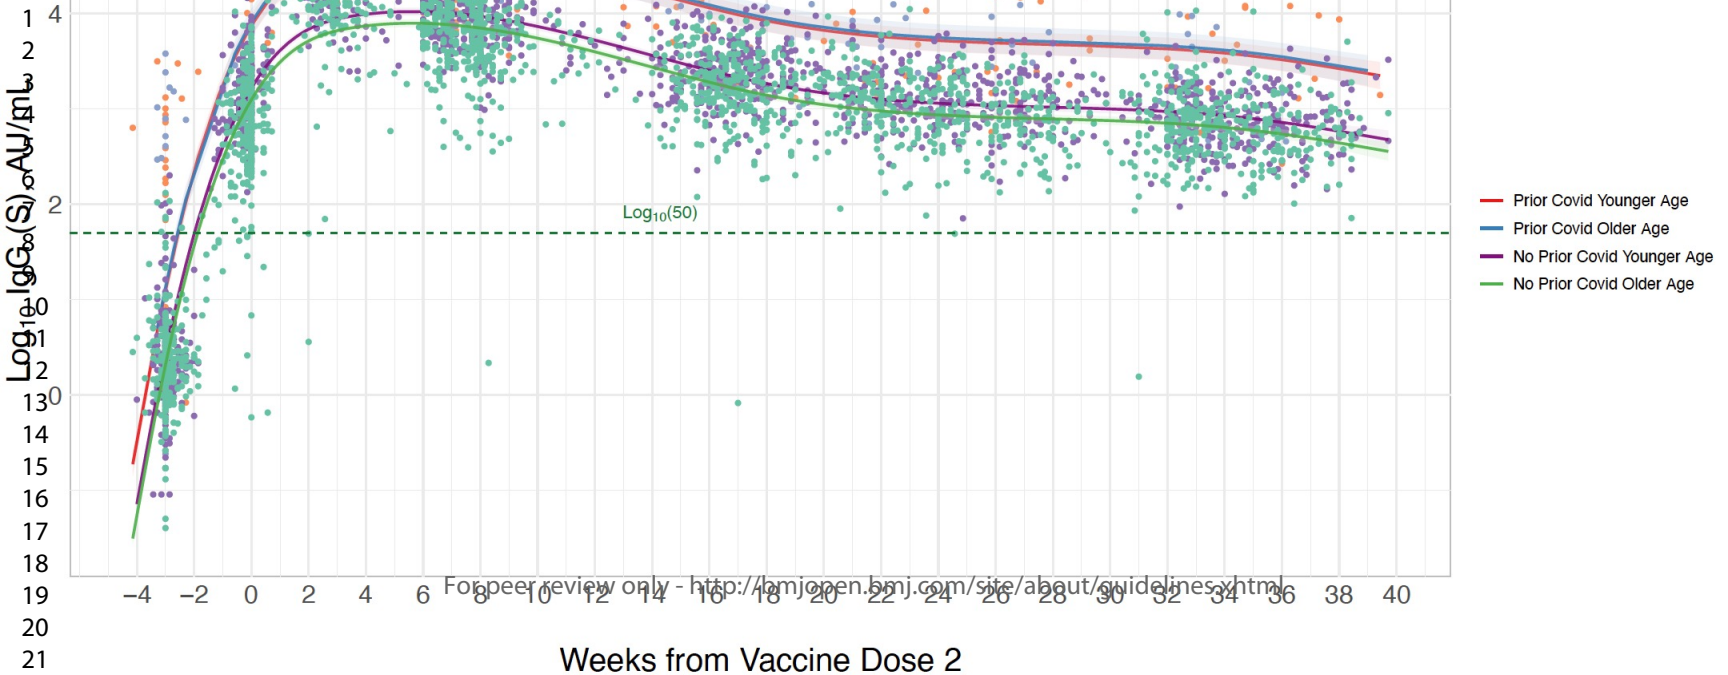

For peer review only - <http://bmjopen.bmj.com/site/about/guidelines.xhtml>

19  
20  
21

BMJ Open

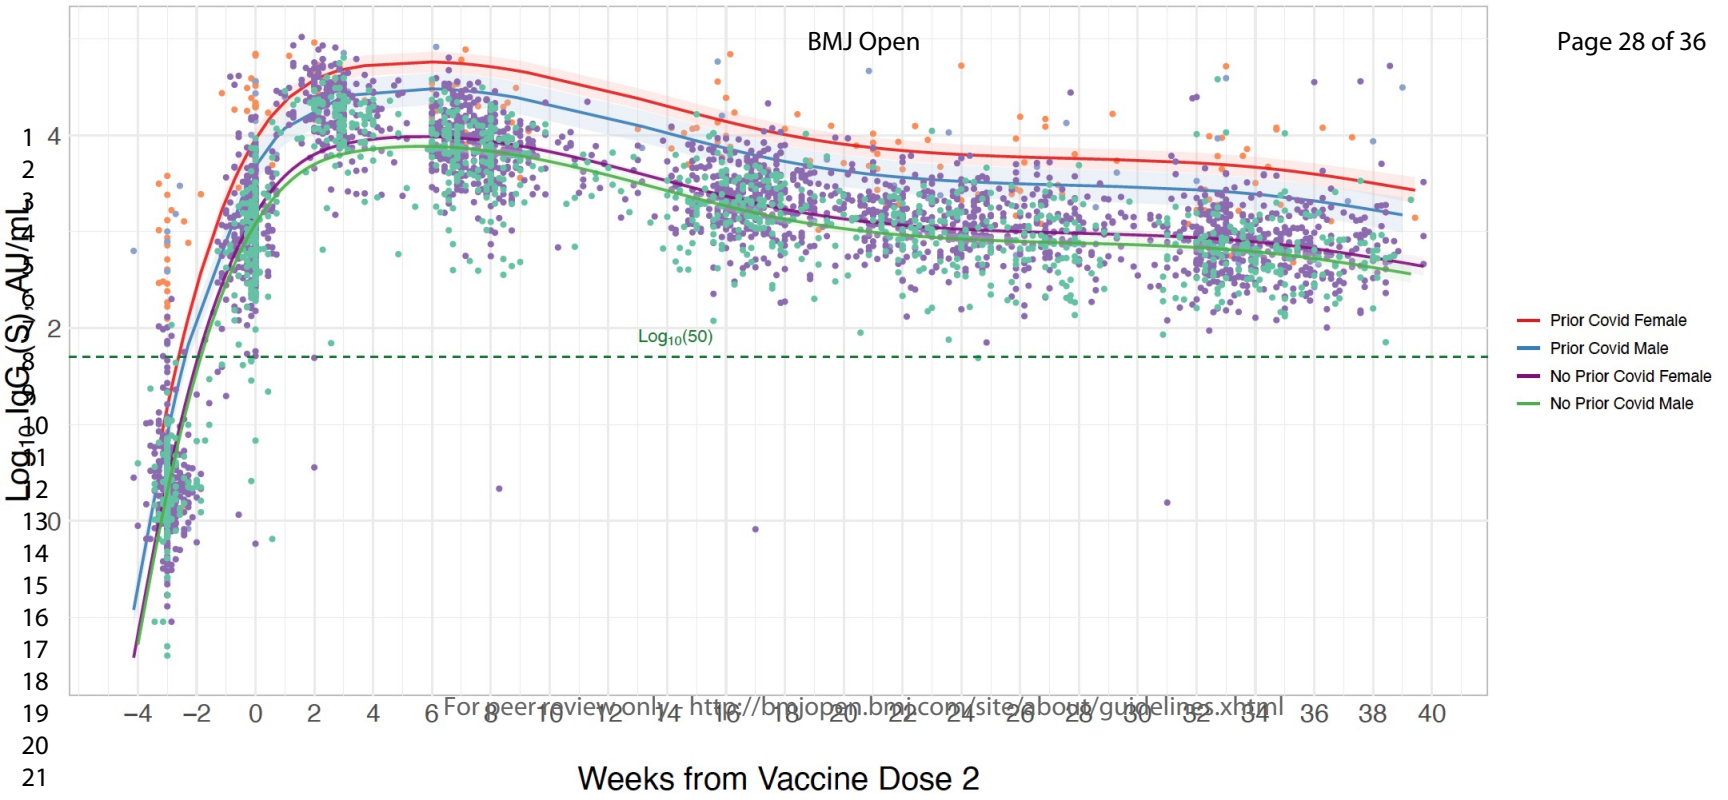

Weeks from Vaccine Dose 2

$\text{Log}_{10}(50)$

- Prior Covid Female
- Prior Covid Male
- No Prior Covid Female
- No Prior Covid Male

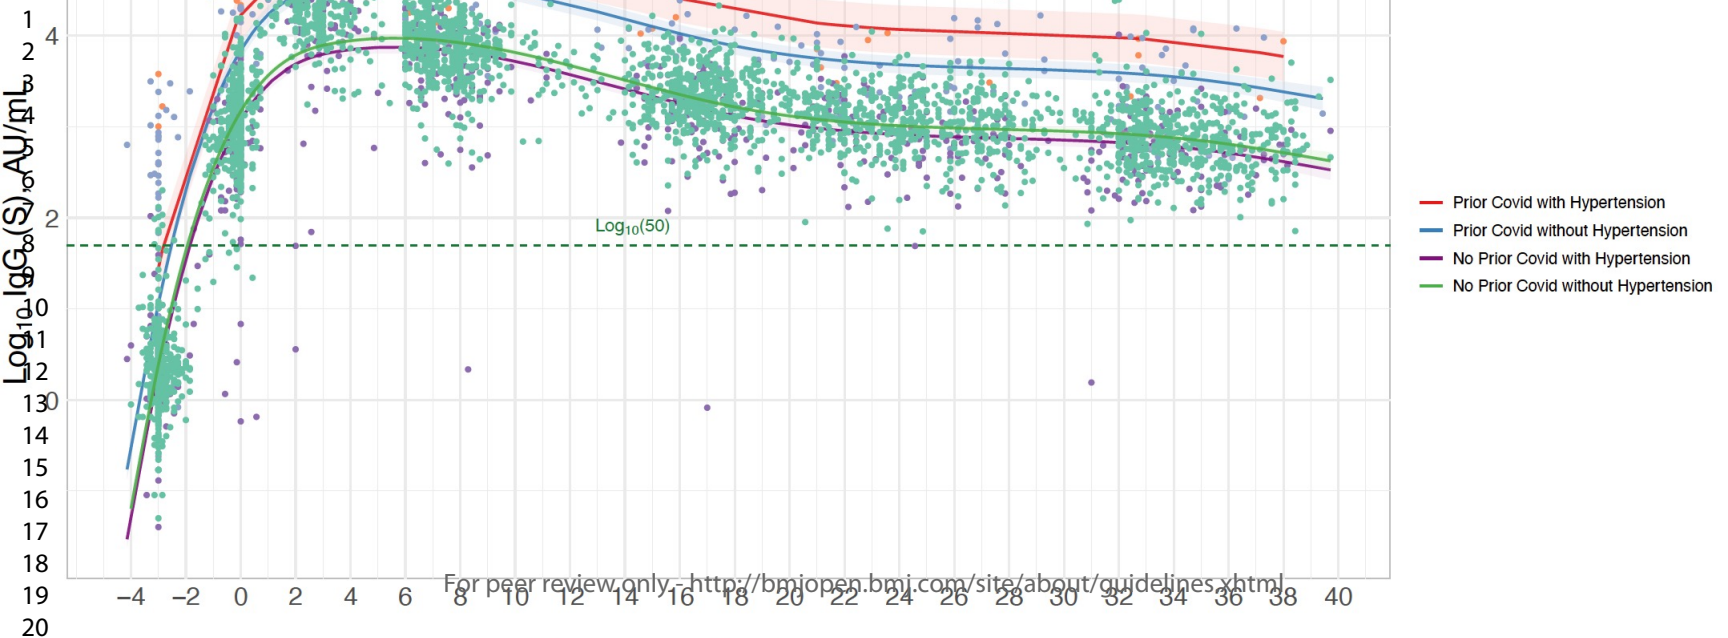

- Prior Covid with Hypertension
- Prior Covid without Hypertension
- No Prior Covid with Hypertension
- No Prior Covid without Hypertension

## Determinants of the Longitudinal Antibody Response Following Initial mRNA Vaccination

### *Supplemental Material*

Supplemental Figure 1 . . . . . 2

Supplemental Table 1 . . . . . 3

Supplemental Table 2 . . . . . 4

Supplemental Table 3 . . . . . 5

Supplemental Table 4 . . . . . 6

### *Correspondence:*

Joseph Ebinger, MD, MS, Department of Cardiology, Smidt Heart Institute, Cedars-Sinai Medical Center, Los Angeles, CA, phone (310) 423-0925, email [joseph.ebinger@csmc.edu](mailto:joseph.ebinger@csmc.edu);

Susan Cheng, MD, MPH, Department of Cardiology, Smidt Heart Institute, Cedars-Sinai Medical Center, Los Angeles, CA, phone (310) 423-2726, email [susan.cheng@cshs.org](mailto:susan.cheng@cshs.org); Kimia

Sobhani, PhD, Department of Pathology and Laboratory Medicine, Cedars-Sinai Medical Center, Los Angeles, CA, phone (310) 423-5405, email [kimia.sobhani@cshs.org](mailto:kimia.sobhani@cshs.org).



Supplemental Figure 1. Cohort Development Flow Diagram.

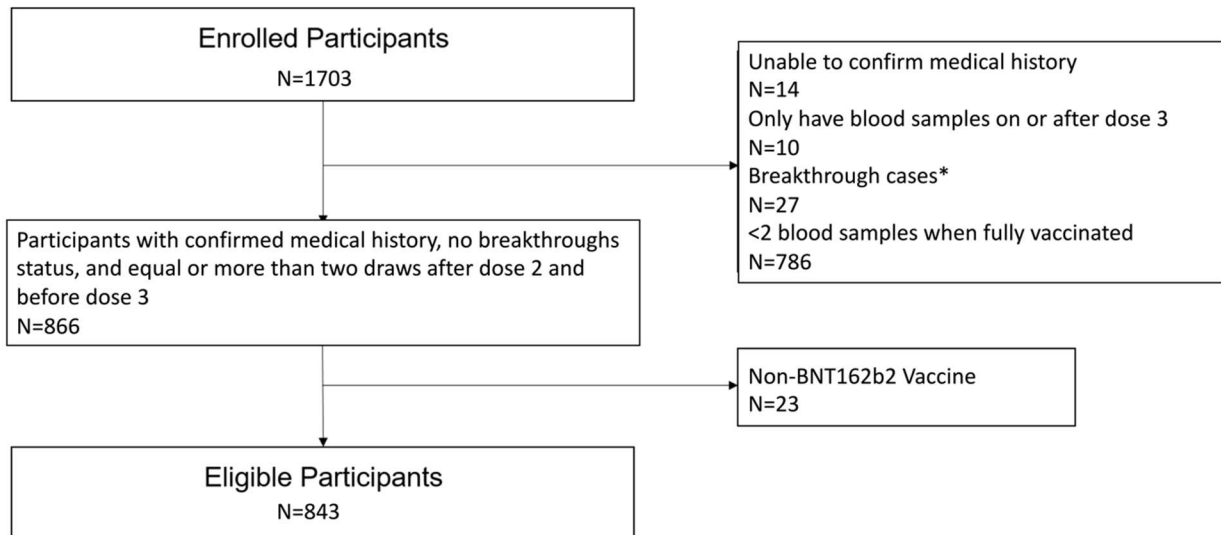

\*Breakthrough cases had IgG N  $\geq 1.4$  when measured fully vaccinated and before the third dose of vaccination, and the measurement of IgG N before is less than 0.4. We also excluded participant who only had one measurement (IgG N  $\geq 1.4$  when fully vaccinated) and no prior covid-19 infection history.

review only

**Supplemental Table 1. Comparison of characteristics between the included and excluded study samples.**

|                            | Total Sample<br>N=1689 | Included<br>N=843 | Excluded<br>N=846 | P      |
|----------------------------|------------------------|-------------------|-------------------|--------|
| Age in years, median [IQR] | 39·9 [33·5, 51·1]      | 41·7 [35·2, 52·8] | 38·0 [32·4, 49·5] | <0·001 |
| Male sex, n (%)            | 537 (31·8)             | 256 (30·4)        | 281 (33·2)        | 0·229  |
| Non-white race, n (%)      | 869 (51·5)             | 405 (48·0)        | 464 (54·8)        | 0·006  |
| Hispanic ethnicity, n (%)  | 221 (13·1)             | 86 (10·2)         | 135 (16·0)        | 0·001  |
| Obesity                    | 250 (14·8)             | 103 (12·2)        | 147 (17·4)        | 0·004  |
| Hypertension               | 241 (14·3)             | 128 (15·2)        | 113 (13·4)        | 0·315  |
| Charlson comorbidity index | 0·0 [0·0, 0·0]         | 0·0 [0·0, 1·0]    | 0·0 [0·0, 0·0]    | 0·006  |

**Supplemental Table 2. Study sample characteristics.**

|                                           | Total Sample         | No Prior SARS-CoV-2 Infection | Prior SARS-CoV-2 Infection | P-Value* |
|-------------------------------------------|----------------------|-------------------------------|----------------------------|----------|
| N                                         | 843                  | 784                           | 59                         |          |
| Age in years, median [IQR]                | 41·66 [35·19, 52·80] | 41·89 [35·25, 53·00]          | 38·72 [34·93, 49·31]       | 0·169    |
| Age in years, range                       | 20·37-87·26          | 20·37-87·26                   | 23·52-76·87                |          |
| Male sex, n (%)                           | 256 (30·4)           | 239 (30·5)                    | 17 (28·8)                  | 0·903    |
| Non-white race, n (%)                     | 405 (48·0)           | 372 (47·4)                    | 33 (55·9)                  | 0·262    |
| Hispanic ethnicity, n (%)                 | 86 (10·2)            | 73 (9·3)                      | 13 (22·0)                  | 0·004    |
| Obesity, n (%)                            | 103 (12·2)           | 92 (11·7)                     | 11 (18·6)                  | 0·175    |
| Hypertension, n (%)                       | 128 (15·2)           | 122 (15·6)                    | 6 (10·2)                   | 0·355    |
| Charlson comorbidity index, median [IQR]† | 0·00 [0·00, 1·00]    | 0·00 [0·00, 1·00]             | 0·00 [0·00, 1·00]          | 0·572    |

\*P-value comparing those with versus without prior SARS-CoV-2 infection.

†The Charlson comorbidity index weights the clinical conditions into a single score to predict 10-year survival: age, myocardial infarction, heart failure, peripheral vascular disease, stroke, dementia, chronic obstructive pulmonary disease, connective tissue disease, peptic ulcer disease, liver disease, diabetes mellitus, hemiplegia, chronic kidney disease, solid tumor, leukemia, lymphoma and AIDS.

**Supplemental Table 3. Correlates of longitudinal anti-spike IgG antibody response following complete initial mRNA vaccination, stratified by prior SARS-CoV-2 infection status.**

|              | No Prior SARS-CoV-2 Infection<br>N=784 |      |        | Prior SARS-CoV-2 Infection<br>N=59 |      |       |
|--------------|----------------------------------------|------|--------|------------------------------------|------|-------|
|              | Beta*                                  | SE   | P      | Beta*                              | SE   | P     |
| Age, year    | -0.01                                  | 0.00 | <0.001 | -0.00                              | 0.01 | 0.74  |
| Male sex     | -0.24                                  | 0.06 | <0.001 | -0.72                              | 0.33 | 0.032 |
| Hypertension | -0.23                                  | 0.08 | 0.005  | 0.96                               | 0.50 | 0.06  |

\*Beta values represent increase in 1-SD of log(10)IgG-S level per presence (vs absence) of a categorical variable or per unit increment of continuous variable), in analyses adjusted for age, sex, and hypertension.

**Supplemental Table 4. Association of prior SARS-CoV-2 infection with longitudinal anti-spike IgG antibody response following complete initial mRNA vaccination, stratified by age, sex, and hypertension status.**

**A.**

|                            | Age <42 years<br>N=421 |      |        | Age ≥42 years<br>N=422 |      |        |
|----------------------------|------------------------|------|--------|------------------------|------|--------|
|                            | Beta*                  | SE   | P      | Beta*                  | SE   | P      |
| Prior SARS-CoV-2 infection | 1.57                   | 0.13 | <0.001 | 1.93                   | 0.19 | <0.001 |

\*Beta values represent increase in 1-SD of log(10)IgG-S level per presence (vs absence) of a categorical variable or per unit increment of continuous variable), in analyses adjusted sex and hypertension.

**B.**

|                            | Males<br>N=256 |      |        | Females<br>N=587 |      |        |
|----------------------------|----------------|------|--------|------------------|------|--------|
|                            | Beta*          | SE   | P      | Beta*            | SE   | P      |
| Prior SARS-CoV-2 infection | 1.35           | 0.20 | <0.001 | 1.86             | 0.13 | <0.001 |

\*Beta values represent increase in 1-SD of log(10)IgG-S level per presence (vs absence) of a categorical variable or per unit increment of continuous variable), in analyses adjusted for age and hypertension.

**C.**

|                            | No Hypertension<br>N=715 |      |        | Hypertension<br>N=128 |      |        |
|----------------------------|--------------------------|------|--------|-----------------------|------|--------|
|                            | Beta*                    | SE   | P      | Beta*                 | SE   | P      |
| Prior SARS-CoV-2 infection | 1.61                     | 0.11 | <0.001 | 2.77                  | 0.43 | <0.001 |

\*Beta values represent increase in 1-SD of log(10)IgG-S level per presence (vs absence) of a categorical variable or per unit increment of continuous variable), in analyses adjusted for age and sex.

## STROBE Statement—checklist of items that should be included in reports of observational studies

|                              | Item No | Recommendation                                                                                                                                                                                                                                                                                                                                                                                                                                                         | Page No |
|------------------------------|---------|------------------------------------------------------------------------------------------------------------------------------------------------------------------------------------------------------------------------------------------------------------------------------------------------------------------------------------------------------------------------------------------------------------------------------------------------------------------------|---------|
| <b>Title and abstract</b>    | 1       | (a) Indicate the study's design with a commonly used term in the title or the abstract                                                                                                                                                                                                                                                                                                                                                                                 | 3       |
|                              |         | (b) Provide in the abstract an informative and balanced summary of what was done and what was found                                                                                                                                                                                                                                                                                                                                                                    | 3       |
| <b>Introduction</b>          |         |                                                                                                                                                                                                                                                                                                                                                                                                                                                                        |         |
| Background/rationale         | 2       | Explain the scientific background and rationale for the investigation being reported                                                                                                                                                                                                                                                                                                                                                                                   | 6       |
| Objectives                   | 3       | State specific objectives, including any prespecified hypotheses                                                                                                                                                                                                                                                                                                                                                                                                       | 6       |
| <b>Methods</b>               |         |                                                                                                                                                                                                                                                                                                                                                                                                                                                                        |         |
| Study design                 | 4       | Present key elements of study design early in the paper                                                                                                                                                                                                                                                                                                                                                                                                                | 7       |
| Setting                      | 5       | Describe the setting, locations, and relevant dates, including periods of recruitment, exposure, follow-up, and data collection                                                                                                                                                                                                                                                                                                                                        | 7       |
| Participants                 | 6       | (a) <i>Cohort study</i> —Give the eligibility criteria, and the sources and methods of selection of participants. Describe methods of follow-up<br><i>Case-control study</i> —Give the eligibility criteria, and the sources and methods of case ascertainment and control selection. Give the rationale for the choice of cases and controls<br><i>Cross-sectional study</i> —Give the eligibility criteria, and the sources and methods of selection of participants | 7       |
|                              |         | (b) <i>Cohort study</i> —For matched studies, give matching criteria and number of exposed and unexposed<br><i>Case-control study</i> —For matched studies, give matching criteria and the number of controls per case                                                                                                                                                                                                                                                 | NA      |
| Variables                    | 7       | Clearly define all outcomes, exposures, predictors, potential confounders, and effect modifiers. Give diagnostic criteria, if applicable                                                                                                                                                                                                                                                                                                                               | 7       |
| Data sources/<br>measurement | 8*      | For each variable of interest, give sources of data and details of methods of assessment (measurement). Describe comparability of assessment methods if there is more than one group                                                                                                                                                                                                                                                                                   | 7       |
| Bias                         | 9       | Describe any efforts to address potential sources of bias                                                                                                                                                                                                                                                                                                                                                                                                              | 8       |
| Study size                   | 10      | Explain how the study size was arrived at                                                                                                                                                                                                                                                                                                                                                                                                                              | 7       |
| Quantitative variables       | 11      | Explain how quantitative variables were handled in the analyses. If applicable, describe which groupings were chosen and why                                                                                                                                                                                                                                                                                                                                           | 8       |
| Statistical methods          | 12      | (a) Describe all statistical methods, including those used to control for confounding                                                                                                                                                                                                                                                                                                                                                                                  | 8       |
|                              |         | (b) Describe any methods used to examine subgroups and interactions                                                                                                                                                                                                                                                                                                                                                                                                    | 8       |
|                              |         | (c) Explain how missing data were addressed                                                                                                                                                                                                                                                                                                                                                                                                                            | NA      |
|                              |         | (d) <i>Cohort study</i> —If applicable, explain how loss to follow-up was addressed<br><i>Case-control study</i> —If applicable, explain how matching of cases and controls was addressed<br><i>Cross-sectional study</i> —If applicable, describe analytical methods taking account of sampling strategy                                                                                                                                                              | NA      |
|                              |         | (e) Describe any sensitivity analyses                                                                                                                                                                                                                                                                                                                                                                                                                                  | 8       |

Continued on next page

| <b>Results</b>           |     |                                                                                                                                                                                                              |       |
|--------------------------|-----|--------------------------------------------------------------------------------------------------------------------------------------------------------------------------------------------------------------|-------|
| Participants             | 13* | (a) Report numbers of individuals at each stage of study—eg numbers potentially eligible, examined for eligibility, confirmed eligible, included in the study, completing follow-up, and analysed            | 7     |
|                          |     | (b) Give reasons for non-participation at each stage                                                                                                                                                         | NA    |
|                          |     | (c) Consider use of a flow diagram                                                                                                                                                                           | NA    |
| Descriptive data         | 14* | (a) Give characteristics of study participants (eg demographic, clinical, social) and information on exposures and potential confounders                                                                     | 9     |
|                          |     | (b) Indicate number of participants with missing data for each variable of interest                                                                                                                          | NA    |
|                          |     | (c) <i>Cohort study</i> —Summarise follow-up time (eg, average and total amount)                                                                                                                             | 8     |
| Outcome data             | 15* | <i>Cohort study</i> —Report numbers of outcome events or summary measures over time                                                                                                                          | 9     |
|                          |     | <i>Case-control study</i> —Report numbers in each exposure category, or summary measures of exposure                                                                                                         | NA    |
|                          |     | <i>Cross-sectional study</i> —Report numbers of outcome events or summary measures                                                                                                                           | NA    |
| Main results             | 16  | (a) Give unadjusted estimates and, if applicable, confounder-adjusted estimates and their precision (eg, 95% confidence interval). Make clear which confounders were adjusted for and why they were included | 9     |
|                          |     | (b) Report category boundaries when continuous variables were categorized                                                                                                                                    | NA    |
|                          |     | (c) If relevant, consider translating estimates of relative risk into absolute risk for a meaningful time period                                                                                             | 9     |
| Other analyses           | 17  | Report other analyses done—eg analyses of subgroups and interactions, and sensitivity analyses                                                                                                               | 9-10  |
| <b>Discussion</b>        |     |                                                                                                                                                                                                              |       |
| Key results              | 18  | Summarise key results with reference to study objectives                                                                                                                                                     | 11    |
| Limitations              | 19  | Discuss limitations of the study, taking into account sources of potential bias or imprecision. Discuss both direction and magnitude of any potential bias                                                   | 13-14 |
| Interpretation           | 20  | Give a cautious overall interpretation of results considering objectives, limitations, multiplicity of analyses, results from similar studies, and other relevant evidence                                   | 14    |
| Generalisability         | 21  | Discuss the generalisability (external validity) of the study results                                                                                                                                        | 13-14 |
| <b>Other information</b> |     |                                                                                                                                                                                                              |       |
| Funding                  | 22  | Give the source of funding and the role of the funders for the present study and, if applicable, for the original study on which the present article is based                                                | 16    |

\*Give information separately for cases and controls in case-control studies and, if applicable, for exposed and unexposed groups in cohort and cross-sectional studies.

**Note:** An Explanation and Elaboration article discusses each checklist item and gives methodological background and published examples of transparent reporting. The STROBE checklist is best used in conjunction with this article (freely available on the Web sites of PLoS Medicine at <http://www.plosmedicine.org/>, Annals of Internal Medicine at <http://www.annals.org/>, and Epidemiology at <http://www.epidem.com/>). Information on the STROBE Initiative is available at [www.strobe-statement.org](http://www.strobe-statement.org).



# BMJ Open

## Demographic and clinical characteristics associated with variations in antibody response to BNT162b2 COVID-19 vaccination among healthcare workers at an academic medical center: a longitudinal cohort analysis

|                                 |                                                                                                                                                                                                                                                                                                                                                                                                                                                                                                                                                                                                                                                                                                                                                                                                                                                                                                                                                                                                                                                                                                                                                                                                                                                                                                                                                                                                                                                                                                                                                                                         |
|---------------------------------|-----------------------------------------------------------------------------------------------------------------------------------------------------------------------------------------------------------------------------------------------------------------------------------------------------------------------------------------------------------------------------------------------------------------------------------------------------------------------------------------------------------------------------------------------------------------------------------------------------------------------------------------------------------------------------------------------------------------------------------------------------------------------------------------------------------------------------------------------------------------------------------------------------------------------------------------------------------------------------------------------------------------------------------------------------------------------------------------------------------------------------------------------------------------------------------------------------------------------------------------------------------------------------------------------------------------------------------------------------------------------------------------------------------------------------------------------------------------------------------------------------------------------------------------------------------------------------------------|
| Journal:                        | <i>BMJ Open</i>                                                                                                                                                                                                                                                                                                                                                                                                                                                                                                                                                                                                                                                                                                                                                                                                                                                                                                                                                                                                                                                                                                                                                                                                                                                                                                                                                                                                                                                                                                                                                                         |
| Manuscript ID                   | bmjopen-2021-059994.R1                                                                                                                                                                                                                                                                                                                                                                                                                                                                                                                                                                                                                                                                                                                                                                                                                                                                                                                                                                                                                                                                                                                                                                                                                                                                                                                                                                                                                                                                                                                                                                  |
| Article Type:                   | Original research                                                                                                                                                                                                                                                                                                                                                                                                                                                                                                                                                                                                                                                                                                                                                                                                                                                                                                                                                                                                                                                                                                                                                                                                                                                                                                                                                                                                                                                                                                                                                                       |
| Date Submitted by the Author:   | 02-Mar-2022                                                                                                                                                                                                                                                                                                                                                                                                                                                                                                                                                                                                                                                                                                                                                                                                                                                                                                                                                                                                                                                                                                                                                                                                                                                                                                                                                                                                                                                                                                                                                                             |
| Complete List of Authors:       | Ebinger, Joseph ; Cedars-Sinai Medical Center<br>Joung, Sandy; Cedars-Sinai Medical Center<br>Liu, Yunxian; Cedars-Sinai Medical Center<br>Wu, Min; Cedars-Sinai Medical Center<br>Weber, Brittany; Brigham and Women's Hospital<br>Claggett, Brian; Brigham and Women's Hospital<br>Botting, Patrick; Cedars-Sinai Medical Center<br>Sun, Nancy; Cedars-Sinai Medical Center, Smidt Heart Institute<br>Driver, Matthew; Cedars-Sinai Medical Center<br>Kao, Yu Hung; Cedars-Sinai Medical Center<br>Khuu, Briana; Cedars-Sinai Medical Center<br>Wynter, Timothy; Cedars-Sinai Medical Center<br>Nguyen , Trevor Trung; Cedars-Sinai Medical Center<br>Alotaibi, Mona; University of California San Diego<br>Prostko, John; Abbott Laboratories<br>Frias, Edwin; Abbott Laboratories<br>Stewart, James; Abbott Laboratories<br>Goodridge, Helen; Cedars-Sinai Medical Center<br>Chen, Peter; Cedars-Sinai Medical Center<br>Jordan, Stanley; Cedars-Sinai Medical Center<br>Jain, Mohit; University of California San Diego<br>Sharma , Sonia; La Jolla Institute for Allergy and Immunology<br>Fert-Bober, Justyna; Cedars-Sinai Medical Center<br>Van Eyk, Jennifer; Cedars-Sinai Medical Center<br>Minissian , Margo; Cedars-Sinai Medical Center<br>Arditi, Moshe; Cedars-Sinai Medical Center, Division of Pediatric Infectious Diseases<br>Melmed, Gil; Cedars-Sinai Medical Center<br>Braun, Jonathan; Cedars-Sinai Medical Center<br>McGovern, Dermot; Cedars-Sinai Medical Center<br>Cheng, Susan; Cedars-Sinai Health System<br>Sobhani , Kimia; Cedars-Sinai Medical Center |
| <b>Primary Subject Heading</b>: | Infectious diseases                                                                                                                                                                                                                                                                                                                                                                                                                                                                                                                                                                                                                                                                                                                                                                                                                                                                                                                                                                                                                                                                                                                                                                                                                                                                                                                                                                                                                                                                                                                                                                     |
| Secondary Subject Heading:      | Infectious diseases, Immunology (including allergy)                                                                                                                                                                                                                                                                                                                                                                                                                                                                                                                                                                                                                                                                                                                                                                                                                                                                                                                                                                                                                                                                                                                                                                                                                                                                                                                                                                                                                                                                                                                                     |

1  
2  
3  
4  
5  
6  
7  
8  
9  
10  
11  
12  
13  
14  
15  
16  
17  
18  
19  
20  
21  
22  
23  
24  
25  
26  
27  
28  
29  
30  
31  
32  
33  
34  
35  
36  
37  
38  
39  
40  
41  
42  
43  
44  
45  
46  
47  
48  
49  
50  
51  
52  
53  
54  
55  
56  
57  
58  
59  
60

|           |                                                          |
|-----------|----------------------------------------------------------|
| Keywords: | COVID-19, Hypertension < CARDIOLOGY, INFECTIOUS DISEASES |
|           |                                                          |

SCHOLARONE™  
Manuscripts



I, the Submitting Author has the right to grant and does grant on behalf of all authors of the Work (as defined in the below author licence), an exclusive licence and/or a non-exclusive licence for contributions from authors who are: i) UK Crown employees; ii) where BMJ has agreed a CC-BY licence shall apply, and/or iii) in accordance with the terms applicable for US Federal Government officers or employees acting as part of their official duties; on a worldwide, perpetual, irrevocable, royalty-free basis to BMJ Publishing Group Ltd ("BMJ") its licensees and where the relevant Journal is co-owned by BMJ to the co-owners of the Journal, to publish the Work in this journal and any other BMJ products and to exploit all rights, as set out in our [licence](#).

The Submitting Author accepts and understands that any supply made under these terms is made by BMJ to the Submitting Author unless you are acting as an employee on behalf of your employer or a postgraduate student of an affiliated institution which is paying any applicable article publishing charge ("APC") for Open Access articles. Where the Submitting Author wishes to make the Work available on an Open Access basis (and intends to pay the relevant APC), the terms of reuse of such Open Access shall be governed by a Creative Commons licence – details of these licences and which [Creative Commons](#) licence will apply to this Work are set out in our licence referred to above.

Other than as permitted in any relevant BMJ Author's Self Archiving Policies, I confirm this Work has not been accepted for publication elsewhere, is not being considered for publication elsewhere and does not duplicate material already published. I confirm all authors consent to publication of this Work and authorise the granting of this licence.

1  
2  
3 **Demographic and clinical characteristics associated with variations in antibody response**  
4 **to BNT162b2 COVID-19 vaccination among healthcare workers at an academic medical**  
5 **center: a longitudinal cohort analysis**  
6  
7  
8  
9

10 Joseph E. Ebinger, MD, MS,<sup>1</sup> Sandy Joung, MHDS,<sup>1</sup> Yunxian Liu, PhD,<sup>1</sup> Min Wu,  
11 MPH,<sup>1</sup> Brittany Weber, MD, PhD,<sup>2</sup> Brian Claggett, PhD,<sup>2</sup> Patrick G. Botting, MSPH,<sup>1</sup> Nancy Sun,  
12 MPS,<sup>1</sup> Matthew Driver, MPH,<sup>1</sup> Yu Hung Kao,BS,<sup>1</sup> Briana Khuu,BS,<sup>1</sup> Timothy Wynter,  
13 BS,<sup>1</sup> Trevor-Trung Nguyen,BS,<sup>1</sup> Mona Alotaibi, MD,<sup>3</sup> John C. Prostko, MS,<sup>4</sup> Edwin C. Frias,  
14 MBA,<sup>4</sup> James L. Stewart, PhD,<sup>4</sup> Helen S. Goodridge, PhD,<sup>5</sup> Peter Chen, MD,<sup>5</sup> Stanley C.  
15 Jordan, MD,<sup>6</sup> Mohit Jain, MD, PhD,<sup>7</sup> Sonia Sharma, PhD,<sup>8</sup> Justyna Fert-Bober, PhD,<sup>1</sup> Jennifer  
16 E. Van Eyk, PhD,<sup>1,9</sup> Margo B. Minissian, PhD,<sup>1,10</sup> Moshe Arditi, MD,<sup>11</sup> Gil Y. Melmed, MD,<sup>12</sup>  
17 Jonathan G. Braun, MD, PhD,<sup>12,13</sup> Dermot P.B. McGovern, MD, PhD,<sup>12</sup> Susan Cheng, MD,  
18 MPH,<sup>1\*</sup> Kimia Sobhani, PhD<sup>13\*</sup>  
19  
20  
21  
22  
23  
24  
25  
26  
27

28 \*Equal contribution  
29  
30

31 From the <sup>1</sup>Department of Cardiology, Smidt Heart Institute, Cedars-Sinai Medical Center, Los  
32 Angeles, CA, USA; <sup>2</sup>Cardiovascular Division, Brigham and Women's Hospital, Boston, MA, USA;  
33  
34 <sup>3</sup>Division of Pulmonary and Critical Care Medicine, University of California, San Diego, San  
35 Diego, CA, USA; <sup>4</sup>Applied Research and Technology, Abbott Diagnostics, Abbott Park, IL, USA;  
36  
37 <sup>5</sup>Department of Biomedical Sciences, Research Division of Immunology, Cedars-Sinai Medical  
38 Center, Los Angeles, CA, USA; <sup>6</sup>Transplant Immunology Laboratory and Comprehensive  
39 Transplant Center, Cedars-Sinai Medical Center, Los Angeles, CA, USA; <sup>7</sup>Department of  
40 Medicine, School of Medicine, University of California, San Diego, San Diego, CA; <sup>8</sup>La Jolla  
41 Institute for Allergy and Immunology, La Jolla, CA, USA; <sup>9</sup>Advanced Clinical Biosystems  
42 Institute, Department of Biomedical Sciences, Cedars-Sinai Medical Center, Los Angeles, CA,  
43 USA; <sup>10</sup>Brawerman Nursing Institute, Cedars-Sinai Medical Center, Los Angeles, CA, USA;  
44  
45 <sup>11</sup>Smidt Heart Institute, Cedars-Sinai Medical Center, Los Angeles, CA, USA; Departments of  
46  
47  
48  
49  
50  
51  
52  
53  
54  
55  
56  
57  
58  
59  
60

1  
2  
3 Pediatrics, Division of Infectious Diseases and Immunology, and Infectious, Immunologic  
4 Diseases Research Center (IIDRC), Los Angeles, CA, USA; Department of Biomedical  
5 Sciences, Cedars-Sinai Medical Center, Los Angeles, CA, USA; <sup>12</sup>F. Widjaja Foundation  
6 Inflammatory Bowel and Immunobiology Research Institute, Cedars Sinai, Los Angeles, CA,  
7 USA; <sup>13</sup>Department of Pathology and Laboratory Medicine, Cedars-Sinai Medical Center, Los  
8 Angeles, CA, USA  
9  
10  
11  
12  
13  
14  
15  
16  
17

18 *Corresponding/Guarantors:*

19  
20 Joseph Ebinger, MD, MS, Department of Cardiology, Smidt Heart Institute, Cedars-Sinai  
21 Medical Center, Los Angeles, CA, phone (310) 423-0925, email [joseph.ebinger@csmc.edu](mailto:joseph.ebinger@csmc.edu);  
22  
23 Susan Cheng, MD, MPH, Department of Cardiology, Smidt Heart Institute, Cedars-Sinai  
24 Medical Center, Los Angeles, CA, phone (310) 423-2726, email [susan.cheng@cshs.org](mailto:susan.cheng@cshs.org); Kimia  
25  
26 Sobhani, PhD, Department of Pathology and Laboratory Medicine, Cedars-Sinai Medical  
27 Center, Los Angeles, CA, phone (310) 423-5405, email [kimia.sobhani@cshs.org](mailto:kimia.sobhani@cshs.org).  
28  
29  
30  
31  
32  
33  
34  
35  
36  
37  
38  
39  
40  
41  
42  
43  
44  
45  
46  
47  
48  
49  
50  
51  
52  
53  
54  
55  
56  
57  
58  
59  
60

Word count: 2841 words

## ABSTRACT

**Objectives** We sought to understand the demographic and clinical factors associated with variations in longitudinal antibody response following completion of 2-dose regimen of BNT162b2 vaccination.

**Design** This study is a 10-month longitudinal cohort study of healthcare workers and serially measured anti-spike protein IgG (IgG-S) antibody levels, using mixed linear models to examine their associations with participant characteristics.

**Setting** A large, multi-site academic medical center in Southern California, USA.

**Participants** A total of 843 healthcare workers met inclusion criteria including completion of an initial two-dose course of BNT162b2 vaccination, complete clinical history and at least 2 blood samples for analysis. Patients had an average age of  $45\pm 13$  years, were 70% female, and 7% with prior SARS-CoV-2 infection.

**Results** Vaccine induced IgG-S levels remained in the positive range for 99.6% of individuals up to 10 months after initial 2-dose vaccination. Prior SARS-CoV-2 infection was the primary correlate of sustained higher post-vaccination IgG-S levels (partial- $r^2=0.133$ ), with a  $1.74\pm 0.11$  SD higher IgG-S response ( $P<0.001$ ). Female sex (beta  $0.27\pm 0.06$ ,  $P<0.001$ ), younger age ( $0.01\pm 0.00$ ,  $P<0.001$ ), and absence of hypertension ( $0.17\pm 0.08$ ,  $P=0.003$ ) were also associated with persistently higher IgG-S responses. Notably, prior SARS-CoV-2 infection augmented the associations of sex ( $-0.42$  for male sex,  $P=0.08$ ) and modified the associations of hypertension ( $1.17$ ,  $P=0.001$ ), such that infection-naïve individuals with hypertension had persistently lower IgG-S levels whereas prior-infected individuals with hypertension exhibited higher IgG-S levels that remained augmented over time.

**Conclusions** While the IgG-S antibody response remains in the positive range for up to 10 months following initial mRNA vaccination in most adults, determinants of sustained higher antibody levels include prior SARS-CoV-2 infection, female sex, younger age, and absence of hypertension. Certain determinants of the longitudinal antibody response appear significantly

1  
2  
3 modified by prior infection status. These findings offer insights regarding factors that may  
4 influence the 'hybrid' immunity conferred by natural infection combined with vaccination.  
5  
6  
7  
8

9 **Keywords:** SARS-CoV-2, longitudinal antibody response, sex differences, hypertension  
10  
11  
12  
13  
14  
15  
16  
17  
18  
19  
20  
21  
22  
23  
24  
25  
26  
27  
28  
29  
30  
31  
32  
33  
34  
35  
36  
37  
38  
39  
40  
41  
42  
43  
44  
45  
46  
47  
48  
49  
50  
51  
52  
53  
54  
55  
56  
57  
58  
59  
60

For peer review only

**Strengths and limitations of this study**

- Evaluation of demographic and clinical characteristics associated with variable longitudinal antibody response following BNT162b2 vaccination.
- Among the longest follow up studies of COVID-19 vaccine associated humoral immune response
- Large, diverse study cohort.
- Prospective study design.
- Assessment of humoral, but not T-cell mediated antibody response.



## INTRODUCTION

Exposure to SARS-CoV-2 or its subunits, via natural infection or vaccination, can elicit a humoral immune response that is measurable in the circulation and correlated with relative protection from future infections.<sup>1-4</sup> Recent studies have indicated that this quantifiable humoral response wanes over time – as soon as 3 to 6 months following either natural infection or initial administration of a SARS-CoV-2 vaccine.<sup>5-7</sup> While certain population subsets may experience more or less durable immunity from an initial natural or vaccine exposure, the demographic and clinical characteristics that may influence temporal variations in provoked humoral immune response currently remain unclear.<sup>8</sup>

Given lack of clarity regarding the factors that could promote accelerated versus delayed decline in acquired SARS-CoV-2 immunity, along with concern for immunocompromised persons at the highest risk for opportunistic infections, governments worldwide have made provisions to offer additional ‘booster’ vaccine doses.<sup>9-11</sup> Amidst rollout of the booster vaccinations, there remains equipoise regarding their appropriateness for individuals suspected of having more robust immunity following initial vaccination – including those recovered from prior SARS-CoV-2 infection and younger healthy persons. In fact, emerging data suggest that individuals who have been both fully vaccinated and previously infected with SARS-CoV-2 are likely to benefit from a ‘hybrid immunity’ that offers durable protection from infection in terms of both strength and longevity.<sup>12-15</sup>

To improve our understanding of the longitudinal immune response following initial SARS-CoV-2 vaccination – and the factors associated with variations in this response – we examined the demographic and clinical correlates of anti-spike IgG antibody (IgG-S) levels measured serially in a large cohort of fully vaccinated adults.

## METHODS

### Study sample

We conducted serial serological assays from a longitudinal cohort study of healthcare workers who received vaccination with Pfizer-BioNTech (BNT162b2) at our medical center in Southern California, with study design and sampling procedures detailed previously.<sup>16</sup> Briefly, participants completed surveys on medical history, exposures, and symptoms at baseline and at serial timepoints over the course of the study. All healthcare workers, including those recovered from prior COVID-19 infection, were advised to receive a full vaccination course including 2 doses of mRNA vaccine according to local department of health and institutional policies. History of SARS-CoV-2 infection prior to vaccination was determined based on self-report along with adjudication of medical records or confirmed presence of antibodies targeting the viral nucleocapsid protein [IgG(N)]; given that the nucleocapsid protein is not produced by mRNA vaccination, elevated IgG(N) antibodies are considered indicative of prior infection. Participants were excluded if they received a vaccine other than BNT162b2, their SARS-CoV-2 infection status could not be confirmed, they developed a breakthrough infection any time after 14 days following second dose, or they did not provide at least 2 blood samples for serology following completion of their second vaccine dose. All participants provided written informed consent for all protocols, which were reviewed and approved by the Cedars-Sinai institutional review board.

### Serology

Serological assays for antibodies to the receptor binding domain (RBD) of the S1 subunit of the viral spike protein [IgG (S-RBD)], and IgG(N) were performed using the Abbott SARS-CoV-2 IgG II assay and SARS-CoV-2 IgG assay, respectively (Abbott Labs, Abbott Park, IL). Antibody levels were measured from plasma samples collected at the following time points: before or up to 3 days after dose 1; within 7 to 21 days after dose 1; within 7 to 21 after dose 2; and then at 8, 16, 24, 32, and 40 weeks after dose 2. We considered an IgG(N) signal to cutoff (S/C) index

1  
2  
3 of  $\geq 1.4$  as denoting definitive seropositive status due to prior SARS-CoV-2 exposure, based on  
4  
5 a previously established thresholds.<sup>17</sup>  
6  
7

## 8 **Statistical analyses**

9  
10 For descriptive statistics, we used analysis of variance to test for differences between  
11  
12 continuous normally distributed variables, Kruskal-Wallis rank sum tests for non-normal  
13  
14 continuous variables, and chi squared test for categorical variables. We used mixed-effect linear  
15  
16 modeling to estimate the mean and 95% confidence interval of  $\log(10)\text{IgG-S}$  levels in relation to  
17  
18 time since the date of complete vaccination (i.e. dose 2), with time expressed using natural  
19  
20 cubic splines. For longitudinal modeling, we used the Akaike Information Criterion (AIC) as a  
21  
22 measure of best fit to select the optimal number of knots, which was optimized when using 4  
23  
24 knots placed at the 5<sup>th</sup>, 35<sup>th</sup>, 65<sup>th</sup>, and 95<sup>th</sup> percentiles. We treated repeated measures for each  
25  
26 participant as random effect and additionally adjusted for age, sex, race, ethnicity, obesity,  
27  
28 hypertension, and the Charlson comorbidity index<sup>18</sup> calculated based on the combination of  
29  
30 information collected from medical history surveys and the electronic health record.<sup>16 19</sup> In  
31  
32 secondary analyses, we repeated multivariable-adjusted mixed-effect regression analyses  
33  
34 including multiplicative interaction terms for any significantly associated demographic or clinical  
35  
36 variables, to assess for potential effect modification of the anticipated relation between prior  
37  
38 SARS-CoV-2 infection on longitudinal  $\log(10)\text{IgG-S}$  trajectory. We conducted all statistical  
39  
40 analyses using R (v4.1.1) and considered statistical significance as a two-tailed P value less  
41  
42 than 0.05.  
43  
44  
45

## 46 **Patient and public involvement**

47  
48 Patients and the public were not involved in the development of this study.  
49  
50  
51  
52  
53  
54  
55  
56  
57  
58  
59  
60

## RESULTS

A total of 1,703 healthcare workers were enrolled in the source cohort between November 30, 2020 and November 11, 2021. From the source cohort, we excluded from the present analysis a total of n=860 individuals based on the following criteria: SARS-CoV-2 infection status could not be confirmed (n=14), developed a breakthrough infection (n=27), did not provide at least 2 blood samples for serology following completion of their second vaccine dose and prior to a 3<sup>rd</sup> vaccine dose (n=796), or did not receive the BNT162b2 vaccine (n=23). After exclusions, the final cohort for the present analysis included N=843 individuals (**Figure 1**). Of these, n=59 (7.0%) had a history of SARS-CoV-2 infection all of whom survived index infection (with only 5% requiring hospitalization) and were considered to have recovered successfully (without persistent or recurrent symptoms). Among participants for whom the date of first positive SARS-CoV-2 PCR was available (n=28), the average time from prior infection to first vaccine dose was 139 days (range 14-292 days). The demographic and clinical characteristics of our study sample (**Table 1**) revealed no clinically important differences in age, sex, or comorbidities between individuals with and without prior infection. Slightly more individuals with compared to without a history of COVID-19 reported working on a hospital ward where COVID-19 patients were cared for (32.2% vs 18.1%, P=0.013). Differences between included and excluded, as well as between older and younger participants are displayed in **Supplemental Tables 1** and **2**.

In spline analyses of the longitudinal trajectory of response in log(10)IgG-S levels following vaccination, we observed that 99.6% of all healthcare worker participants had repeated values that remained within the positive reference range of  $\geq \log(10)50$  AU/mL over the entire follow-up period of up to 40 weeks (**Figure 2**). The number of blood samples available each week, stratified by prior COVID-19 status is presented in **Supplemental Figure 1**. In multivariable-adjusted models examining demographic and clinical correlates of longitudinal IgG-S levels, we found that prior SARS-CoV-2 infection was associated with substantially higher

1  
2  
3 antibody levels with prior infected individuals exhibiting an almost 1·7-fold higher standard  
4 deviation in log(10)IgG-S levels compared to never infected individuals (**Table 2**). Whereas  
5 younger age and female sex were also significantly associated with higher IgG-S levels over the  
6 duration of the study period, prior SARS-CoV-2 infection was the predominant determinant with  
7 the largest model partial  $r^2$  value of 0·134. These results indicate that 13·4% of the observed  
8 variation in longitudinal IgG-S levels was attributable to prior infection status even after  
9 accounting for other covariates in the model that include age, sex, race, ethnicity, hypertension,  
10 obesity, and the Charlson comorbidity burden index.

11  
12 In secondary analyses, we found that the interaction between age and prior infection  
13 status on longitudinal IgG-S levels was non-significant (beta 0·37,  $P=0\cdot10$ , **Figure 3**,  
14 **Supplemental Table 3**) although, in exploratory analyses stratified by prior infection status,  
15 older age was significantly associated with lower IgG-S response among infection-naïve  
16 individuals whereas no significant age-based association was seen in prior-infected individuals  
17 (**Supplemental Table 4**). This is similar to the interaction of male sex with prior infection (beta -  
18 0·42,  $P=0\cdot08$ , **Figure 4**, **Supplemental Table 3**), with stratified analysis demonstrating that  
19 male compared to female sex was associated with greater magnitude of difference in IgG-S  
20 level in prior infected (beta -0·72 [se 0·33],  $P=0\cdot032$ ) compared to never infected individuals  
21 (beta -0·24 [se 0·06],  $P<0\cdot001$ ) (**Supplemental Table 4**). Notably, we observed a significant  
22 interaction between hypertension and prior infection (beta 1·17,  $P=0\cdot001$ , **Figure 5**,  
23 **Supplemental Table 3**), with hypertension significantly associated with lower IgG-S levels in  
24 never infected persons (beta -0·23 [se 0·08],  $P=0\cdot005$ ) while concurrently related to higher IgG-  
25 S levels in prior infected individuals (beta 0·96 [se 0·50],  $P=0\cdot06$ ) in stratified analysis  
26 (**Supplemental Table 4**). Similarly, age and sex demonstrated a significant interaction, such  
27 that older age (above the median cohort age of 42 years) was associated with lower antibody  
28 levels among males compared to females (**Supplemental Table 3**). Analyses stratified by age,  
29  
30  
31  
32  
33  
34  
35  
36  
37  
38  
39  
40  
41  
42  
43  
44  
45  
46  
47  
48  
49  
50  
51  
52  
53  
54  
55  
56  
57  
58  
59  
60

1  
2  
3 sex, and prior infection status demonstrated concordant results (**Supplemental Table 5**). The  
4 number of blood samples available each week, stratified by age, sex and hypertensive status  
5 are presented in **Supplemental Figure 1**.  
6  
7  
8  
9  
10  
11  
12  
13  
14  
15  
16  
17  
18  
19  
20  
21  
22  
23  
24  
25  
26  
27  
28  
29  
30  
31  
32  
33  
34  
35  
36  
37  
38  
39  
40  
41  
42  
43  
44  
45  
46  
47  
48  
49  
50  
51  
52  
53  
54  
55  
56  
57  
58  
59  
60

## DISCUSSION

From our study of repeated serological measures performed in a large cohort with two-dose initial BNT162b2 vaccination, there were several key findings. First, we found that the vast majority of adults in our cohort maintained appropriate elevations of IgG-S antibody levels within the positive reference range up to 10 months following initial complete vaccination. Second, the primary differentiator of antibody response trajectory was prior SARS-CoV-2 infection, with a relatively fixed magnitude of variance that lasted throughout the follow up period. Finally, correlates of persistently higher longitudinal antibody response level included female sex, younger age, and absence of hypertension in analyses adjusting for race, ethnicity, and comorbidities. Intriguingly, the longitudinal effect of prior infection status was differentially modified by these associations – particularly hypertension status.

Extending from prior studies,<sup>5,6</sup> we repeated serological measures up to 10 months following initial SARS-CoV-2 vaccination in a large cohort of adults who receive their BNT162b2 vaccinations according to the standardized 2-dose schedule. While observing an initial peak and then steady decline in the absolute levels of IgG-S antibody response, as seen in other studies, we also found a relatively consistent pattern of longitudinal response that almost invariably involved levels remaining in the positive range during the follow-up period. Specifically, we found that the average trajectory of response in IgG-S antibody levels peaks within the first 2 to 8 weeks after the second vaccine dose and then declines towards a relative plateau – seen on the log<sub>10</sub> scale – that lasts up to 40 weeks. Notwithstanding continued reductions in the absolute IgG-S antibody levels, the relative plateau on the log scale signals an attenuation in the rate of decline and is consistent with the longitudinal patterns of post-vaccination antibody titer response that has been reported for other viruses (e.g. influenza) and predicted for SARS-CoV-2.<sup>20-22</sup> Although the threshold of 50 AU/mL for absolute IgG-S antibody levels is validated with 99.5% specificity for detecting antibodies specific to the SARS-CoV-2 spike protein, and

1  
2  
3 the exact quantitative thresholds that may correspond to effective immunity remains unclear, a  
4 relative plateau in the log<sub>10</sub> scale presence of IgG-S offers some assurance of continued  
5 memory B cell activation potentially indicative of an even broader immunological reserve.  
6  
7  
8  
9

10 In addition to the overall trajectory common to most participants, we found that the  
11 primary and persistent differentiator of antibody response trajectory was prior SARS-CoV-2  
12 infection. Extending from prior studies that examined serological responses up to 6 months after  
13 SARS-CoV-2 vaccination,<sup>5</sup> we observed a relatively fixed magnitude of difference in provoked  
14 IgG-S levels – consistently higher in prior infected compared to never infected individuals –  
15 persisting beyond 10 months. The absence of any indication that this difference is narrowing  
16 suggests that the ‘hybrid’ immunity obtained from the combination of natural infection and  
17 vaccination is likely to endure over time – a phenomenon consistent with recent findings of  
18 dynamic memory B cell activation and clonal turnover in individuals exposed to both natural  
19 infection and vaccine.<sup>12</sup> Furthermore, and intriguingly, prior infected individuals had persistently  
20 elevated post-vaccine antibody levels that did not differ by age – indicating minimal influence of  
21 age-related humoral deficiency on the ‘hybrid’ or dose-boosted effect.<sup>23 24</sup> We recommend that  
22 the age-based results of our analyses be interpreted with caution, given the relatively younger  
23 overall age range of our cohort. Additional studies in cohorts with older age ranges are needed  
24 to assess the generalizability of our findings. By contrast, the female advantage in antibody  
25 response to SARS-CoV-2 vaccination has been previously reported<sup>6 25</sup> and in our cohort  
26 appeared accentuated by prior infection such that previously infected females tended to exhibit  
27 the most pronounced as well as persistently elevated antibody response. Females are known to  
28 generate antibody responses to a variety of viral vaccines that are almost twice as high as the  
29 responses seen in males.<sup>26</sup> Augmentation and persistence of this sex difference in the setting of  
30 ‘hybrid’ SARS-CoV-2 exposure points to a female advantage in at least humoral immunity that  
31  
32  
33  
34  
35  
36  
37  
38  
39  
40  
41  
42  
43  
44  
45  
46  
47  
48  
49  
50  
51  
52  
53  
54  
55  
56  
57  
58  
59  
60



1  
2  
3 could represent a mechanistic contributor to the female advantage seen in COVID-19 related  
4  
5 outcomes.  
6

7  
8 Our results regarding the associations of hypertension with longitudinal antibody  
9  
10 response are especially notable. Extending from prior studies focused on initial post-vaccine  
11  
12 effects,<sup>27 28</sup> we found that presence of hypertension was associated with an overall lower level  
13  
14 antibody response that was consistent over time and persisted for up to 10 months. Intriguingly,  
15  
16 we also found that among persons with prior SARS-CoV-2 infection, the association of  
17  
18 hypertension status on longitudinal IgG-S antibody response was reversed. In effect,  
19  
20 longitudinal antibody levels are profoundly increased among hypertensive participants with prior  
21  
22 COVID-19 compared to without prior COVID-19. Previous studies have demonstrated a more  
23  
24 robust antibody response following native infection among hypertensive individuals – attributed  
25  
26 to a combination of increased sympathetic drive and an underlying inflammatory state serving to  
27  
28 enhance immune activation.<sup>29 30</sup> These same factors have been hypothesized as contributors to  
29  
30 the greater mortality risk seen among hypertensive COVID-19 patients. In light of the lower  
31  
32 antibody response to vaccination seen in hypertensives overall, the paradoxically higher  
33  
34 response seen in hypertensives with prior COVID-19 is similar to the trend seen for older-aged  
35  
36 individuals with prior infection. In both situations, a pre-existing relative deficiency in immune  
37  
38 reserve is superseded by the effects of having been directly exposed to and then recovered  
39  
40 from COVID-19. Importantly, these effects appear to persist in the population over time.  
41  
42  
43

44 Several limitations of this study merit consideration. First, all participants received the  
45  
46 Pfizer-BioNTech (BNT162b2) vaccine, limiting generalizability to other vaccines, although  
47  
48 variable waning of antibody levels following other SARS-CoV-2 vaccines has been described.<sup>8</sup>  
49  
50 All participants were also healthcare workers with the greater risk for repeated SARS-CoV-2  
51  
52 exposure via the work environment, which may or may not have influenced their long-term  
53  
54 antibody response. There also exists potential bias in the study population, as not all  
55  
56  
57  
58  
59  
60

1  
2  
3 participants provided longitudinal serology data, although there were negligible clinically  
4 meaningful differences between those with and without adequate serology data for inclusion.  
5  
6 Importantly, all prior infected individuals in our study were not only survivors of COVID-19 but  
7  
8 were predominantly less severely affected with only 5% requiring hospitalizations, all of which  
9  
10 lasted less than 5 days, and none reporting continued or recurrent symptoms following recovery  
11  
12 from the index infection. This issue is particularly important to consider when interpreting  
13  
14 interaction analyses, as a provoked humoral immune response that is augmented to a level that  
15  
16 is sufficient for countering infection is likely different from an exaggeration in response that may  
17  
18 contribute to end-organ dysfunction or continued symptoms. Additionally, the majority of prior  
19  
20 infected individuals had pre-vaccination antibody levels measured within a similar range to  
21  
22 infection naïve individuals, likely a result of the antibody decay that has been observed in prior  
23  
24 studies of longitudinal antibody response following natural infection.<sup>31</sup> Further studies are  
25  
26 needed to assess longitudinal antibody response to vaccination administered within shorter-time  
27  
28 frames following prior infection. To accommodate healthcare worker availability for participation,  
29  
30 plasma samples were collected within a 7-21 day period after each vaccine dose and the  
31  
32 differences in timing within these sampling windows may have contributed to some variation in  
33  
34 results. Because viral variant testing was not routinely conducted for participant samples, data  
35  
36 on which variants contributed to confirmed infections were not available for analyses. We also  
37  
38 do not address non-humoral related immune protection, which may protect or predispose to  
39  
40 future infections.  
41  
42  
43  
44  
45

46 In summary, our findings indicate that completion of a two-dose mRNA vaccine regimen  
47  
48 provokes an IgG-S antibody response that is not only enhanced but also persistent among  
49  
50 individuals with prior SARS-CoV-2 infection when compared to those without prior infection.  
51  
52 Further, our results demonstrate potential sex and hypertension specific variations in the  
53  
54 longitudinal response to single vs dual antigenic exposure that may guide more tailored  
55  
56  
57  
58  
59  
60

1  
2  
3 assessments of individual-level risks for future infection. In particular, the role of hypertension as  
4 a potential potent modifier of antibody response, with divergent post-vaccination effects  
5 between those with and without prior infection, may reflect key differences in physiologically  
6 mediated immune response among those with and without high blood pressure. These findings  
7 may allow for allocation of still limited vaccine resources by targeting individuals most likely to  
8 benefit from additional vaccine doses.  
9  
10  
11  
12  
13  
14  
15  
16  
17  
18  
19  
20  
21  
22  
23  
24  
25  
26  
27  
28  
29  
30  
31  
32  
33  
34  
35  
36  
37  
38  
39  
40  
41  
42  
43  
44  
45  
46  
47  
48  
49  
50  
51  
52  
53  
54  
55  
56  
57  
58  
59  
60

## Contributors

JEE contributed via Conceptualization, Methodology, Validation, Formal Analysis, Investigation, Data Curation, Writing - Original Draft, Writing - Review & Editing, Visualization, and Project Administration. SJ contributed via Conceptualization, Resources, Data Curation, and Writing - Review & Editing. YL and MW contributed via Methodology, Formal Analysis, Writing - Original Draft, Writing - Review & Editing, and Visualization. BW, YHK, BK, TW, TTN, and MA contributed via Resources and Data Curation. BC contributed via Formal Analysis, Writing - Review & Editing, and Supervision. PGB, NS, and MD contributed via Validation, Investigation, and Writing - Review & Editing. JCP contributed via Methodology, Investigation, and Writing - Review & Editing. ECF contributed via Investigation and Resources. JLS, HSG, PC, and SCJ, contributed via Investigation, Resources, and Writing - Review & Editing. MJ contributed via Investigation, Resources, Writing - Review & Editing, and Funding Acquisition. SS, JFB, JEVE, MBM, MA, and GYM contributed via Investigation and Writing - Review & Editing. JGB contributed via Investigation, Writing - Review & Editing, Project Administration, and Funding Acquisition. DPBM contributed via Investigation, Writing - Review & Editing, and Project Administration. SC and KS Conceptualization, Methodology, Validation, Formal Analysis, Investigation, Data Curation, Writing - Original Draft, Writing - Review & Editing, Visualization, Supervision, Project Administration, and Funding Acquisition. The corresponding authors attest that all listed authors meet authorship criteria and that no others meeting the criteria have been omitted. The manuscript's guarantors (JEE, SC, KS) affirm that this manuscript is an honest, accurate, and transparent account of the study being reported; that no important aspects of the study have been omitted; and that any discrepancies from the study as planned have been explained.

## Competing interests

1  
2  
3 JCP, ECF, and JLS work for Abbott Diagnostics, a company that performed the serological  
4 assays on the biospecimens that were collected for this study. The remaining authors have no  
5 disclosures to report.  
6  
7  
8  
9

## 10 11 **Funding**

12 This work was supported by the Erika J Glazer Family Foundation (no award number), F. Widjaja  
13 Family Foundation (no award number), Helmsley Charitable Trust (no award number), and NIH  
14 grants U54-AG065141 and K23-HL153888. Funders had no role in study design, data collection,  
15 data analysis, data interpretation, or writing of the report.  
16  
17  
18  
19  
20  
21  
22  
23  
24

## 25 **Ethics approval**

26 This study was approved by the Cedars-Sinai Institutional Review Board (IRB) (CORALE  
27 Study00000621). All participants provided written informed consent for all protocols.  
28  
29  
30  
31  
32  
33  
34

## 35 **Data availability statement**

36 Due to the sensitive nature of the data collected for this study, requests to access the dataset  
37 from qualified researchers trained in protocols on the protection of human subjects may be sent  
38 to Cedars-Sinai Medical Center at [biodatacore@cshs.org](mailto:biodatacore@cshs.org).  
39  
40  
41  
42  
43  
44  
45  
46

## 47 **Acknowledgments**

48 We are grateful to all the front-line healthcare workers in our healthcare system who continue to  
49 be dedicated to delivering the highest quality care for all patients, as well as the invaluable  
50 contributions of the CORALE and EMBARC study investigators and staff.  
51  
52  
53  
54  
55  
56  
57  
58  
59  
60

## References

1. Khoury DS, Cromer D, Reynaldi A, et al. Neutralizing antibody levels are highly predictive of immune protection from symptomatic SARS-CoV-2 infection. *Nat Med* 2021;27(7):1205-11. doi: 10.1038/s41591-021-01377-8 [published Online First: 2021/05/19]
2. Edara VV, Norwood C, Floyd K, et al. Infection- and vaccine-induced antibody binding and neutralization of the B.1.351 SARS-CoV-2 variant. *Cell Host Microbe* 2021;29(4):516-21 e3. doi: 10.1016/j.chom.2021.03.009 [published Online First: 2021/04/03]
3. Corbett KS, Nason MC, Flach B, et al. Immune correlates of protection by mRNA-1273 vaccine against SARS-CoV-2 in nonhuman primates. *Science* 2021;373(6561):eabj0299. doi: 10.1126/science.abj0299 [published Online First: 2021/09/17]
4. Bergwerk M, Gonen T, Lustig Y, et al. Covid-19 Breakthrough Infections in Vaccinated Health Care Workers. *N Engl J Med* 2021;385(16):1474-84. doi: 10.1056/NEJMoa2109072 [published Online First: 2021/07/29]
5. Zhong D, Xiao S, Debes AK, et al. Durability of Antibody Levels After Vaccination With mRNA SARS-CoV-2 Vaccine in Individuals With or Without Prior Infection. *JAMA* 2021 doi: 10.1001/jama.2021.19996
6. Levin EG, Lustig Y, Cohen C, et al. Waning Immune Humoral Response to BNT162b2 Covid-19 Vaccine over 6 Months. *New England Journal of Medicine* 2021 doi: 10.1056/NEJMoa2114583

- 1  
2  
3 7. Roltgen K, Powell AE, Wirz OF, et al. Defining the features and duration of antibody  
4  
5 responses to SARS-CoV-2 infection associated with disease severity and outcome. *Sci*  
6  
7 *Immunol* 2020;5(54):eabe0240. doi: 10.1126/sciimmunol.abe0240 [published Online  
8  
9 First: 2020/12/09]  
10  
11
- 12 8. Shrotri M, Navaratnam AMD, Nguyen V, et al. Spike-antibody waning after second dose of  
13  
14 BNT162b2 or ChAdOx1. *Lancet* 2021;398(10298):385-87. doi: 10.1016/S0140-  
15  
16 6736(21)01642-1 [published Online First: 2021/07/19]  
17  
18
- 19 9. Janeway CA Jr TP, Walport M, et al. Immunobiology: The Immune System in Health and  
20  
21 Disease. 5th Edition ed. New York: Garland Science 2001.  
22  
23
- 24 10. Bar-On YM, Goldberg Y, Mandel M, et al. Protection of BNT162b2 Vaccine Booster against  
25  
26 Covid-19 in Israel. *N Engl J Med* 2021;385(15):1393-400. doi: 10.1056/NEJMoa2114255  
27  
28 [published Online First: 2021/09/16]  
29  
30
- 31 11. CDC Statement on ACIP Booster Recommendations: Centers for Disease Control and  
32  
33 Prevention, 2021.  
34  
35
- 36 12. Wang Z, Muecksch F, Schaefer-Babajew D, et al. Naturally enhanced neutralizing breadth  
37  
38 against SARS-CoV-2 one year after infection. *Nature* 2021;595(7867):426-31. doi:  
39  
40 10.1038/s41586-021-03696-9 [published Online First: 2021/06/15]  
41  
42  
43
- 44 13. Cho A, Muecksch F, Schaefer-Babajew D, et al. Anti-SARS-CoV-2 receptor binding domain  
45  
46 antibody evolution after mRNA vaccination. *Nature* 2021 doi: 10.1038/s41586-021-  
47  
48 04060-7 [published Online First: 2021/10/08]  
49  
50
- 51 14. Crotty S. Hybrid immunity. *Science* 2021;372(6549):1392-93. doi: 10.1126/science.abj2258  
52  
53  
54  
55  
56  
57  
58

- 1  
2  
3 15. Stamatatos L, Czartoski J, Wan YH, et al. mRNA vaccination boosts cross-variant  
4 neutralizing antibodies elicited by SARS-CoV-2 infection. *Science* 2021 doi:  
5 10.1126/science.abg9175 [published Online First: 2021/03/27]  
6  
7  
8  
9  
10 16. Ebinger JE, Botwin GJ, Albert CM, et al. Seroprevalence of antibodies to SARS-CoV-2 in  
11 healthcare workers: a cross-sectional study. *BMJ Open* 2021;11(2):e043584. doi:  
12 10.1136/bmjopen-2020-043584 [published Online First: 2021/02/14]  
13  
14  
15  
16  
17 17. SARS-CoV-2 IgG II Quant Assay - Instructions for Use - FDA  
18 (<https://www.fda.gov/media/137383/download>). 6S60: Abbott Laboratories, Diagnostics  
19 Division, December 2020.  
20  
21  
22  
23  
24 18. Charlson ME, Pompei P, Ales KL, et al. A new method of classifying prognostic comorbidity  
25 in longitudinal studies: development and validation. *J Chronic Dis* 1987;40(5):373-83.  
26 doi: 10.1016/0021-9681(87)90171-8 [published Online First: 1987/01/01]  
27  
28  
29  
30  
31 19. Ebinger JE, Fert-Bober J, Printsev I, et al. Antibody responses to the BNT162b2 mRNA  
32 vaccine in individuals previously infected with SARS-CoV-2. *Nat Med* 2021;27(6):981-  
33 84. doi: 10.1038/s41591-021-01325-6 [published Online First: 2021/04/03]  
34  
35  
36  
37  
38 20. Clapham H, Hay J, Routledge I, et al. Seroepidemiologic Study Designs for Determining  
39 SARS-COV-2 Transmission and Immunity. *Emerg Infect Dis* 2020;26(9):1978-86. doi:  
40 10.3201/eid2609.201840 [published Online First: 2020/06/17]  
41  
42  
43  
44  
45 21. Young BE, Mak TM, Ang LW, et al. Influenza vaccine failure in the tropics: a retrospective  
46 cohort study of waning effectiveness. *Epidemiol Infect* 2020;148:e299. doi:  
47 10.1017/s0950268820002952 [published Online First: 2020/12/03]  
48  
49  
50  
51  
52  
53  
54  
55  
56  
57  
58  
59  
60



- 1  
2  
3 22. Zhao X, Ning Y, Chen MI-C, et al. Individual and Population Trajectories of Influenza  
4  
5 Antibody Titers Over Multiple Seasons in a Tropical Country. *American Journal of*  
6  
7 *Epidemiology* 2017;187(1):135-43. doi: 10.1093/aje/kwx201  
8  
9
- 10 23. Richards NE, Keshavarz B, Workman LJ, et al. Comparison of SARS-CoV-2 Antibody  
11  
12 Response by Age Among Recipients of the BNT162b2 vs the mRNA-1273 Vaccine.  
13  
14 *JAMA Netw Open* 2021;4(9):e2124331. doi: 10.1001/jamanetworkopen.2021.24331  
15  
16 [published Online First: 2021/09/03]  
17  
18
- 19 24. Collier DA, Ferreira I, Kotagiri P, et al. Age-related immune response heterogeneity to  
20  
21 SARS-CoV-2 vaccine BNT162b2. *Nature* 2021;596(7872):417-22. doi: 10.1038/s41586-  
22  
23 021-03739-1 [published Online First: 2021/07/01]  
24  
25
- 26 25. Demonbreun AR, Sancilio A, Velez ME, et al. COVID-19 mRNA Vaccination Generates  
27  
28 Greater Immunoglobulin G Levels in Women Compared to Men. *J Infect Dis*  
29  
30 2021;224(5):793-97. doi: 10.1093/infdis/jiab314 [published Online First: 2021/06/13]  
31  
32  
33
- 34 26. Flanagan KL, Fink AL, Plebanski M, et al. Sex and Gender Differences in the Outcomes of  
35  
36 Vaccination over the Life Course. *Annu Rev Cell Dev Biol* 2017;33:577-99. doi:  
37  
38 10.1146/annurev-cellbio-100616-060718 [published Online First: 2017/10/11]  
39  
40
- 41 27. Lustig Y, Sapir E, Regev-Yochay G, et al. BNT162b2 COVID-19 vaccine and correlates of  
42  
43 humoral immune responses and dynamics: a prospective, single-centre, longitudinal  
44  
45 cohort study in health-care workers. *The Lancet Respiratory Medicine* 2021;9(9):999-  
46  
47 1009. doi: 10.1016/S2213-2600(21)00220-4  
48  
49
- 50 28. Singh AK, Phatak SR, Singh R, et al. Antibody response after first and second-dose of  
51  
52 ChAdOx1-nCOV (Covishield™) and BBV-152 (Covaxin™) among health care  
53  
54 workers in India: The final results of cross-sectional coronavirus vaccine-induced  
55  
56  
57  
58

1  
2  
3 antibody titre (COVAT) study. *Vaccine* 2021;39(44):6492-509. doi:

4  
5 <https://doi.org/10.1016/j.vaccine.2021.09.055>  
6  
7

8 29. Sereti E, Stamatelopoulos KS, Zakopoulos NA, et al. Hypertension: An immune related  
9 disorder? *Clinical Immunology* 2020;212:108247. doi:

10  
11 <https://doi.org/10.1016/j.clim.2019.108247>  
12  
13

14  
15 30. Singh MV, Chapleau MW, Harwani SC, et al. The immune system and hypertension.  
16

17  
18 *Immunol Res* 2014;59(1-3):243-53. doi: 10.1007/s12026-014-8548-6  
19

20  
21 31. Cohen KW, Linderman SL, Moodie Z, et al. Longitudinal analysis shows durable and broad  
22 immune memory after SARS-CoV-2 infection with persisting antibody responses and  
23 memory B and T cells. *Cell Reports Medicine* 2021;2(7):100354. doi:

24  
25  
26  
27 <https://doi.org/10.1016/j.xcrm.2021.100354>  
28  
29  
30  
31  
32  
33  
34  
35  
36  
37  
38  
39  
40  
41  
42  
43  
44  
45  
46  
47  
48  
49  
50  
51  
52  
53  
54  
55  
56  
57  
58  
59  
60

**Table 1. Study sample characteristics.**

|                                           | Total Sample         | No Prior SARS-CoV-2 Infection | Prior SARS-CoV-2 Infection | P-Value* |
|-------------------------------------------|----------------------|-------------------------------|----------------------------|----------|
| N                                         | 843                  | 784                           | 59                         |          |
| Age in years, median [IQR]                | 41·66 [35·19, 52·80] | 41·89 [35·25, 53·00]          | 38·72 [34·93, 49·31]       | 0·169    |
| Age in years, range                       | 20·37-87·26          | 20·37-87·26                   | 23·52-76·87                |          |
| Male sex, n (%)                           | 256 (30·4)           | 239 (30·5)                    | 17 (28·8)                  | 0·903    |
| Non-white race, n (%)                     | 405 (48·0)           | 372 (47·4)                    | 33 (55·9)                  | 0·262    |
| Hispanic ethnicity, n (%)                 | 86 (10·2)            | 73 (9·3)                      | 13 (22·0)                  | 0·004    |
| Obesity, n (%)                            | 103 (12·2)           | 92 (11·7)                     | 11 (18·6)                  | 0·175    |
| Hypertension, n (%)                       | 128 (15·2)           | 122 (15·6)                    | 6 (10·2)                   | 0·355    |
| Charlson comorbidity index, median [IQR]† | 0·00 [0·00, 1·00]    | 0·00 [0·00, 1·00]             | 0·00 [0·00, 1·00]          | 0·572    |
| Work Environment‡                         |                      |                               |                            |          |
| ICU, COVID-19 unit                        | 135 (16·1)           | 126 (16·2)                    | 9 (15·3)                   | 1·00     |
| ICU, non-COVID-19 unit                    | 133 (15·9)           | 129 (16·5)                    | 4 (6·8)                    | 0·073    |
| Ward, COVID-19 unit                       | 160 (19·1)           | 141 (18·1)                    | 19 (32·2)                  | 0·013    |
| Ward, non-COVID-19 unit                   | 204 (24·3)           | 193 (24·7)                    | 11 (18·6)                  | 0·37     |
| Emergency Department / Urgent care        | 98 (11·7)            | 94 (12·1)                     | 4 (6·8)                    | 0·315    |
| Outpatient clinic                         | 215 (25·6)           | 206 (26·4)                    | 9 (15·3)                   | 0·082    |
| Office                                    | 129 (15·4)           | 119 (15·3)                    | 10 (16·9)                  | 0·873    |
| Work from home                            | 61 (7·3)             | 57 (7·3)                      | 4 (6·8)                    | 1·00     |
| Other                                     | 185 (22·1)           | 177 (22·7)                    | 8 (13·6)                   | 0·142    |
| Unknown                                   | 74 (8·8)             | 71 (9·1)                      | 3 (5·1)                    | 0·423    |

\*P-value comparing those with versus without prior SARS-CoV-2 infection.

†The Charlson comorbidity index weights the clinical conditions into a single score to predict 10-year survival: age, myocardial infarction, heart failure, peripheral vascular disease, stroke, dementia, chronic obstructive pulmonary disease, connective tissue disease, peptic ulcer disease, liver disease, diabetes mellitus, hemiplegia, chronic kidney disease, solid tumor, leukemia, lymphoma and AIDS.

‡Participant provided work environment. Participants could select multiple environments if they worked in more than one location.

**Table 2. Clinical and demographic correlates of longitudinal anti-spike IgG antibody response following complete initial mRNA vaccination.**

|                            | Beta* | SE   | P      | Partial r <sup>2</sup> |
|----------------------------|-------|------|--------|------------------------|
| Prior SARS-CoV-2 infection | 1.74  | 0.11 | <0.001 | 0.134                  |
| Age, year                  | -0.01 | 0.00 | <0.001 | 0.016                  |
| Male sex                   | -0.27 | 0.06 | <0.001 | 0.013                  |
| Non-white race             | -0.00 | 0.06 | 0.99   | 0.000                  |
| Hispanic ethnicity         | 0.02  | 0.10 | 0.80   | 0.000                  |
| Obesity                    | 0.03  | 0.09 | 0.77   | 0.000                  |
| Hypertension               | -0.17 | 0.08 | 0.041  | 0.003                  |
| Charlson comorbidity index | -0.02 | 0.03 | 0.56   | 0.000                  |

\*Beta values represent increase in 1-SD of log(10)IgG-S level per presence (vs absence) of a categorical variable or per unit increment of continuous variable).

1  
2  
3 **Figure 1. Cohort development flow diagram**  
4  
5  
6

7 **Figure 2. Longitudinal trajectory of IgG-S antibody levels following completed BNT162b2**  
8 **vaccination**  
9

10  
11 Multivariable-adjusted longitudinal trajectories are shown for individuals with a history of prior  
12 COVID-19 infection (orange line) for those without prior COVID-19 infection (green line).  
13  
14 Longitudinal estimates with 95% confidence limits (shaded areas) are adjusted for age, sex, and  
15  
16  
17  
18  
19  
20  
21  
22  
23  
24  
25  
26  
27  
28  
29  
30  
31  
32  
33  
34  
35  
36  
37  
38  
39  
40  
41  
42  
43  
44  
45  
46  
47  
48  
49  
50  
51  
52  
53  
54  
55  
56  
57  
58  
59  
60

22 **Figure 3. Longitudinal trajectory of IgG-S antibody levels following completed BNT162b2**  
23 **vaccination by prior infection status and age**  
24

25  
26 Multivariable-adjusted longitudinal trajectories are shown for individuals with a history of prior  
27 COVID-19 infection for those without prior COVID-19 infection, including an interaction for age  
28 (above vs below median cohort age). Longitudinal estimates with 95% confidence limits (shaded  
29  
30  
31  
32  
33  
34  
35  
36  
37  
38  
39  
40  
41  
42  
43  
44  
45  
46  
47  
48  
49  
50  
51  
52  
53  
54  
55  
56  
57  
58  
59  
60

37 **Figure 4. Longitudinal trajectory of IgG-S antibody levels following completed BNT162b2**  
38 **vaccination by prior infection status and sex**  
39

40  
41 Multivariable-adjusted longitudinal trajectories are shown for individuals with a history of prior  
42 COVID-19 infection for those without prior COVID-19 infection, including an interaction for sex.  
43  
44 Longitudinal estimates with 95% confidence limits (shaded areas) are adjusted for age and  
45  
46  
47  
48  
49  
50  
51  
52  
53  
54  
55  
56  
57  
58  
59  
60

51 **Figure 5. Longitudinal trajectory of IgG-S antibody levels following completed BNT162b2**  
52 **vaccination by prior infection and hypertension status**  
53

54  
55 Multivariable-adjusted longitudinal trajectories are shown for individuals with a history of prior  
56  
57  
58  
59  
60

1  
2  
3  
4  
5  
6  
7  
8  
9  
10  
11  
12  
13  
14  
15  
16  
17  
18  
19  
20  
21  
22  
23  
24  
25  
26  
27  
28  
29  
30  
31  
32  
33  
34  
35  
36  
37  
38  
39  
40  
41  
42  
43  
44  
45  
46  
47  
48  
49  
50  
51  
52  
53  
54  
55  
56  
57  
58  
59  
60

COVID-19 infection for those without prior COVID-19 infection, including an interaction for sex.  
Longitudinal estimates with 95% confidence limits (shaded areas) are adjusted for age and sex.

For peer review only

1  
2  
3  
4  
5  
6  
7  
8  
9  
10  
11  
12  
13  
14  
15  
16  
17  
18  
19  
20  
21  
22  
23  
24  
25  
26  
27  
28  
29  
30  
31  
32  
33  
34  
35  
36  
37

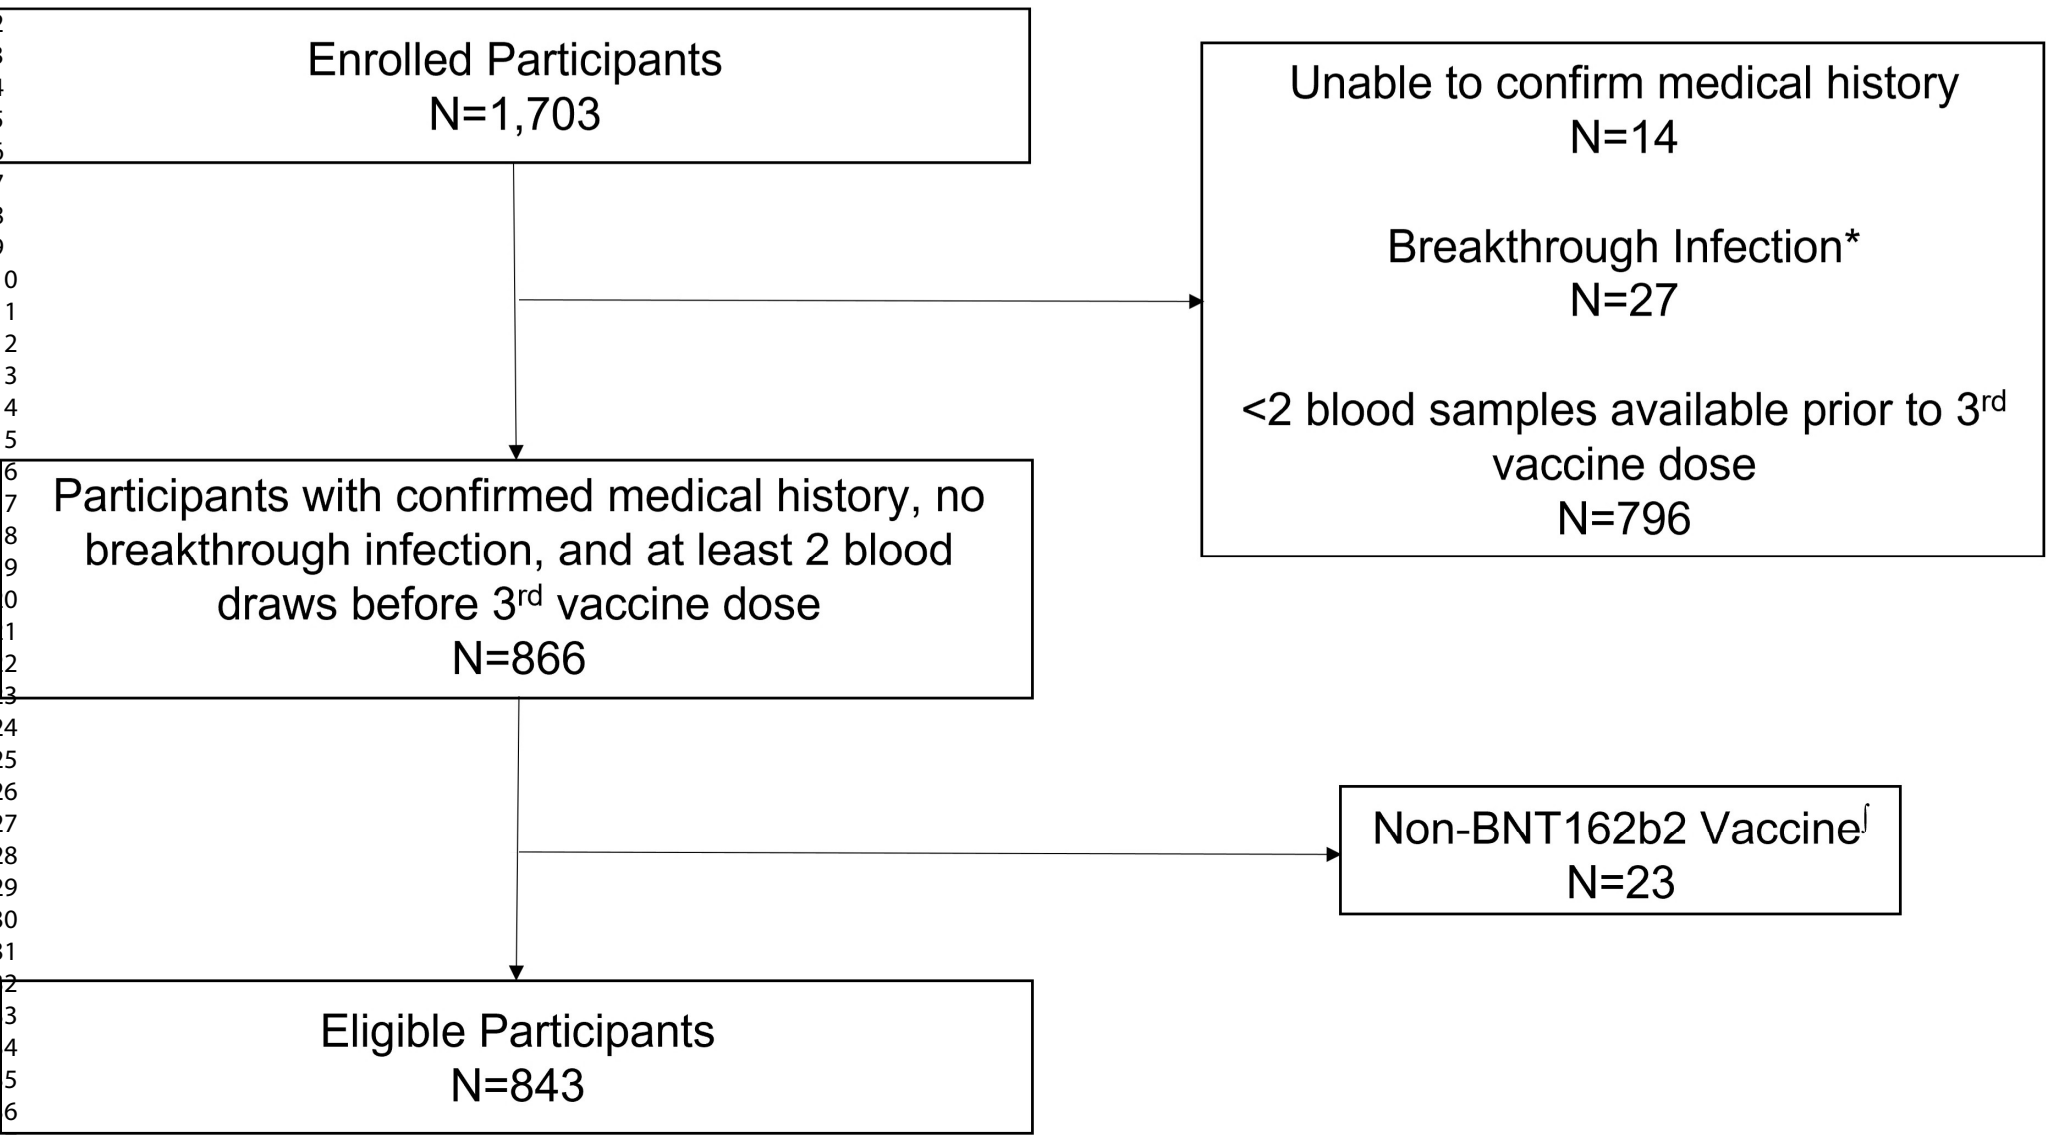

\*Breakthrough cases defined as IgG(N)  $\geq 1.4$  when measured after receiving 2 mRNA vaccine doses and prior to a 3<sup>rd</sup> dose, with prior IgG(N)  $< 0.4$  or no history of prior COVID-19 infection.

<sup>f</sup>Participants who received any vaccine other than BNT162b2.

43  
44  
45  
46  
47

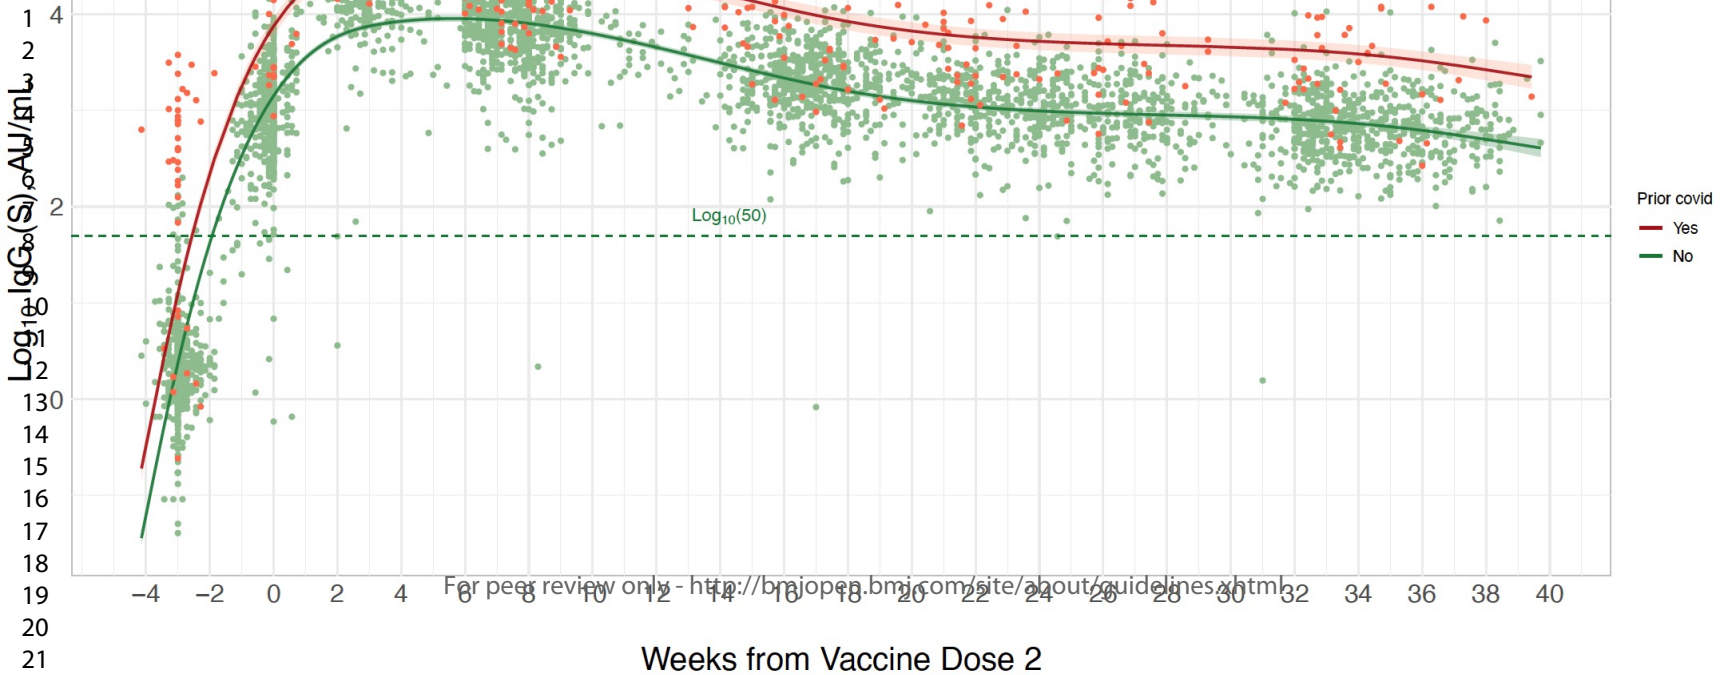

For peer review only - <http://bmjopen.bmj.com/site/about/guidelines.xhtml>



1  
2  
3  
4  
5  
6  
7  
8  
9  
10  
11  
12  
13  
14  
15  
16  
17  
18  
19  
20  
21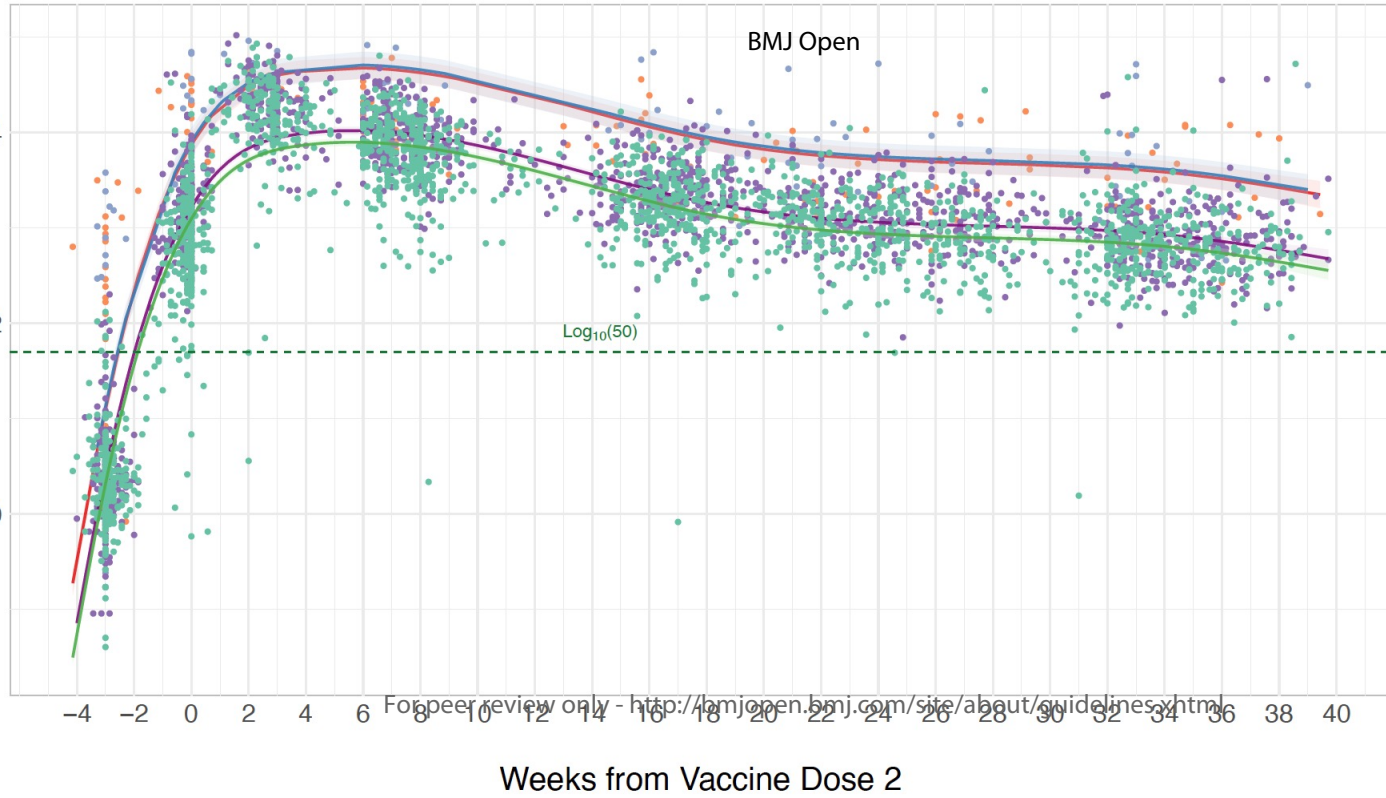

Weeks from Vaccine Dose 2

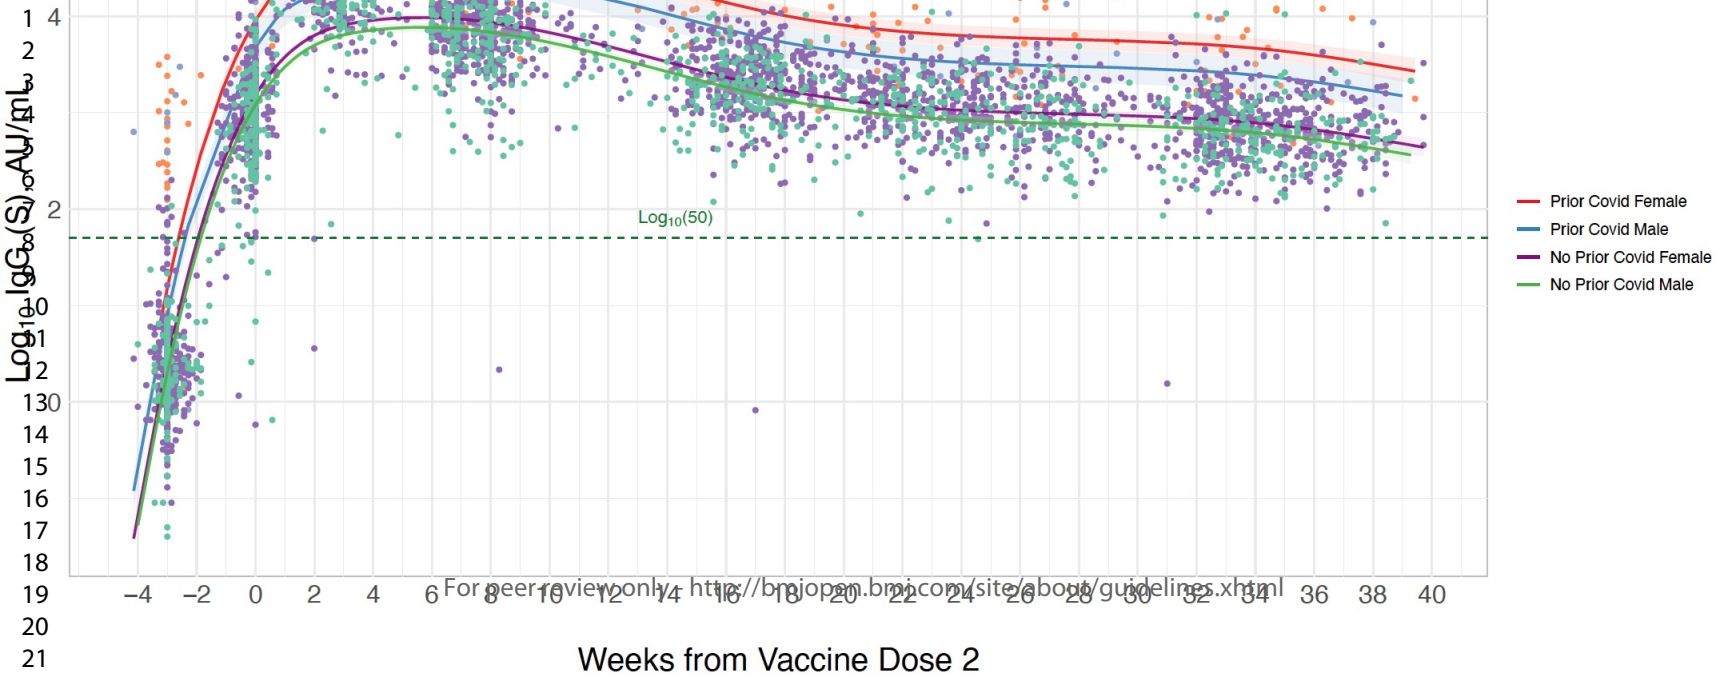

For peer review only: <http://bmjopen.bmj.com/site/about/guidelines.xhtml>

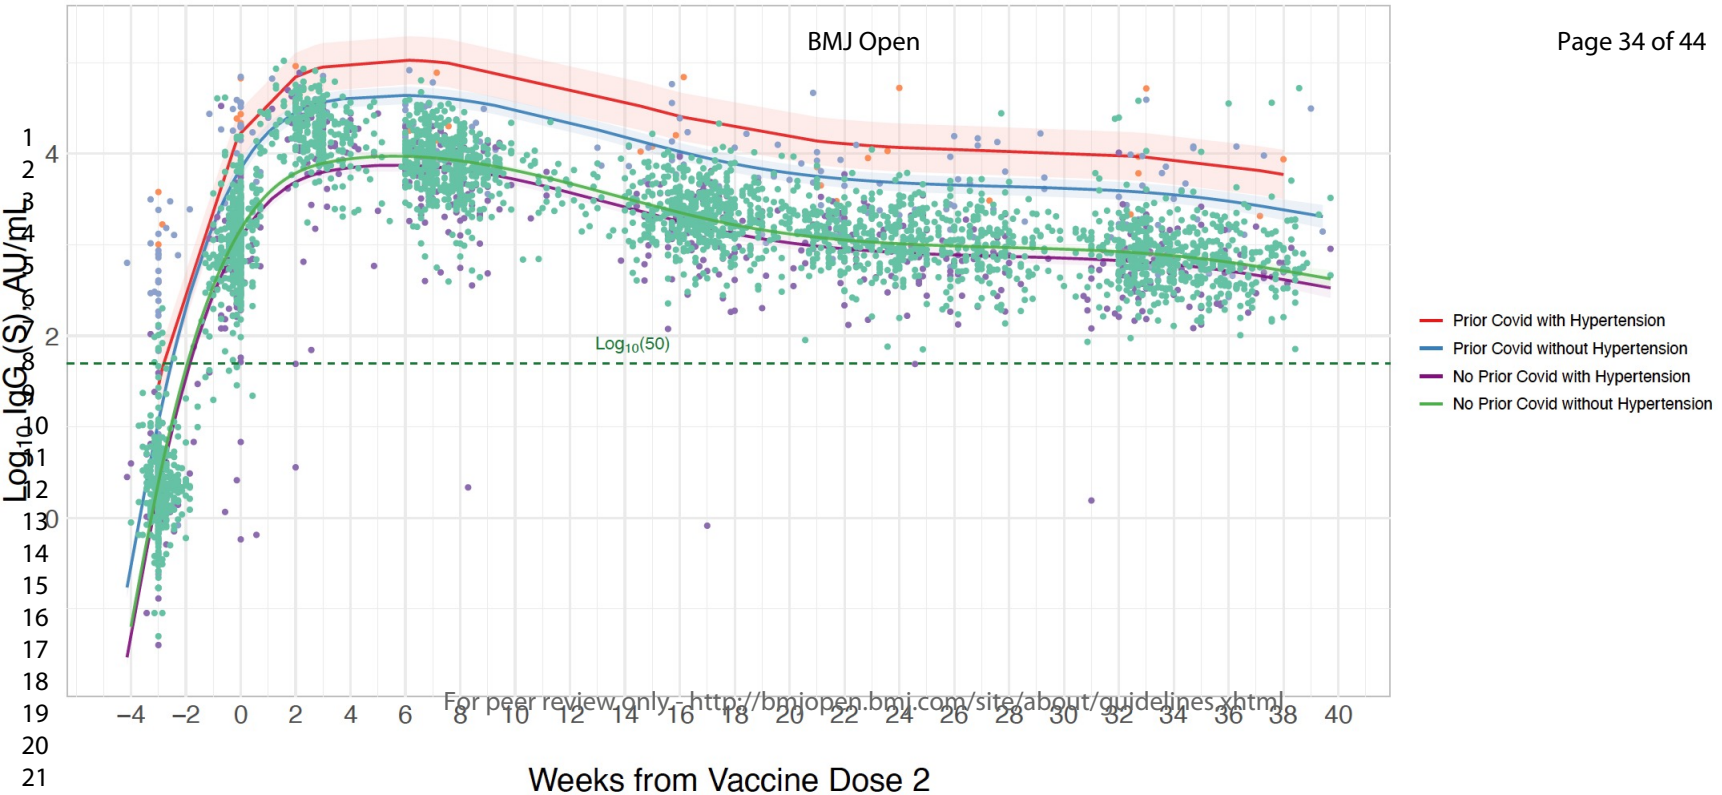

1  
2  
3  
4 **Longitudinal Cohort Analysis of Demographic and Clinical Characteristics Associated**  
5  
6 **with Variations in Antibody Response to BNT162b2 Vaccination Among Healthcare**  
7  
8 **Workers at an Academic Medical Center**  
9

10  
11  
12 *Supplemental Material*  
13  
14  
15  
16  
17  
18  
19

20 Supplemental Table 1 ..... 2  
21  
22 Supplemental Table 2 ..... 3  
23  
24 Supplemental Figure 1 ..... 4  
25  
26 Supplemental Table 3 ..... 6  
27  
28 Supplemental Table 4 ..... 8  
29  
30 Supplemental Table 5 ..... 9  
31  
32  
33  
34  
35  
36  
37  
38  
39  
40

41  
42  
43  
44  
45  
46  
47  
48  
49  
50  
51  
52  
53  
54  
55  
56  
57  
58  
59  
60

*Correspondence:*

Joseph Ebinger, MD, MS, Department of Cardiology, Smidt Heart Institute, Cedars-Sinai  
Medical Center, Los Angeles, CA, phone (310) 423-0925, email [joseph.ebinger@csmc.edu](mailto:joseph.ebinger@csmc.edu);

Susan Cheng, MD, MPH, Department of Cardiology, Smidt Heart Institute, Cedars-Sinai  
Medical Center, Los Angeles, CA, phone (310) 423-2726, email [susan.cheng@cshs.org](mailto:susan.cheng@cshs.org); Kimia

Sobhani, PhD, Department of Pathology and Laboratory Medicine, Cedars-Sinai Medical  
Center, Los Angeles, CA, phone (310) 423-5405, email [kimia.sobhani@cshs.org](mailto:kimia.sobhani@cshs.org).

**Supplemental Table 1:** Comparison of characteristics between the included and excluded study samples.

|                             | Total Sample<br>N=1703 | Included<br>N=843 | Excluded<br>N=860    | P      |
|-----------------------------|------------------------|-------------------|----------------------|--------|
| Age in years, median [IQR]  | 39.90 [33.59, 51.06]   | 41.7 [35.2, 52.8] | 38.01 [32.41, 49.51] | <0.001 |
| Male sex, n (%)             | 539 (31.7)             | 256 (30.4)        | 283 (32.9)           | 0.283  |
| Non-white race, n (%)       | 879 (51.6)             | 405 (48.0)        | 474 (55.1)           | 0.004  |
| Hispanic ethnicity, n (%)   | 224 (13.2)             | 86 (10.2)         | 138 (16.0)           | <0.001 |
| Obesity                     | 252 (14.8)             | 103 (12.2)        | 149 (17.3)*          | 0.004  |
| Hypertension                | 243 (14.3)             | 128 (15.2)        | 115 (13.4)*          | 0.318  |
| Charlson comorbidity index† | 0.00 [0.00, 0.00]      | 0.0 [0.0, 1.0]    | 0.00 [0.00, 0.00]*   | 0.009  |

\*The data shown are for the 846 excluded participants who had medical history data available for ascertaining these clinical characteristics (i.e. obesity, hypertension, and Charlson comorbidity index).

†The Charlson comorbidity index weights the clinical conditions into a single score to predict 10-year survival: age, myocardial infarction, heart failure, peripheral vascular disease, stroke, dementia, chronic obstructive pulmonary disease, connective tissue disease, peptic ulcer disease, liver disease, diabetes mellitus, hemiplegia, chronic kidney disease, solid tumor, leukemia, lymphoma and AIDS.

**Supplemental Table 2. Comparison of characteristics between the older and younger study participants.**

|                            | Total Sample<br>N=843 | Younger Age*<br>N=421 | Older Age*<br>N=422  | P      |
|----------------------------|-----------------------|-----------------------|----------------------|--------|
| Age in years, median [IQR] | 41.66 [35.19, 52.80]  | 35.19 [31.55, 38.02]  | 52.80 [46.66, 62.25] | <0.001 |
| Male sex, n (%)            | 256 (30.4)            | 105 (24.9)            | 151 (35.8)           | 0.001  |
| Non-white race, n (%)      | 405 (48.0)            | 224 (53.2)            | 181 (42.9)           | 0.003  |
| Hispanic ethnicity, n (%)  | 86 (10.2)             | 59 (14.0)             | 27 (6.4)             | <0.001 |
| Obesity                    | 103 (12.2)            | 43 (10.2)             | 60 (14.2)            | 0.095  |
| Hypertension               | 128 (15.2)            | 21 (5.0)              | 107 (25.4)           | <0.001 |
| Charlson comorbidity index | 0.00 [0.00, 1.00]     | 0.00 [0.00, 0.00]     | 0.00 [0.00, 1.00]    | <0.001 |

\*Age definition based on if participant was younger or older in age than the median cohort age of 41.7 years.

**Supplemental Figure 1. Number of available blood samples at each time point, stratified by prior COVID-19 status A) alone, or in combination with B) age, C) sex, and D) hypertension.**

**A.**

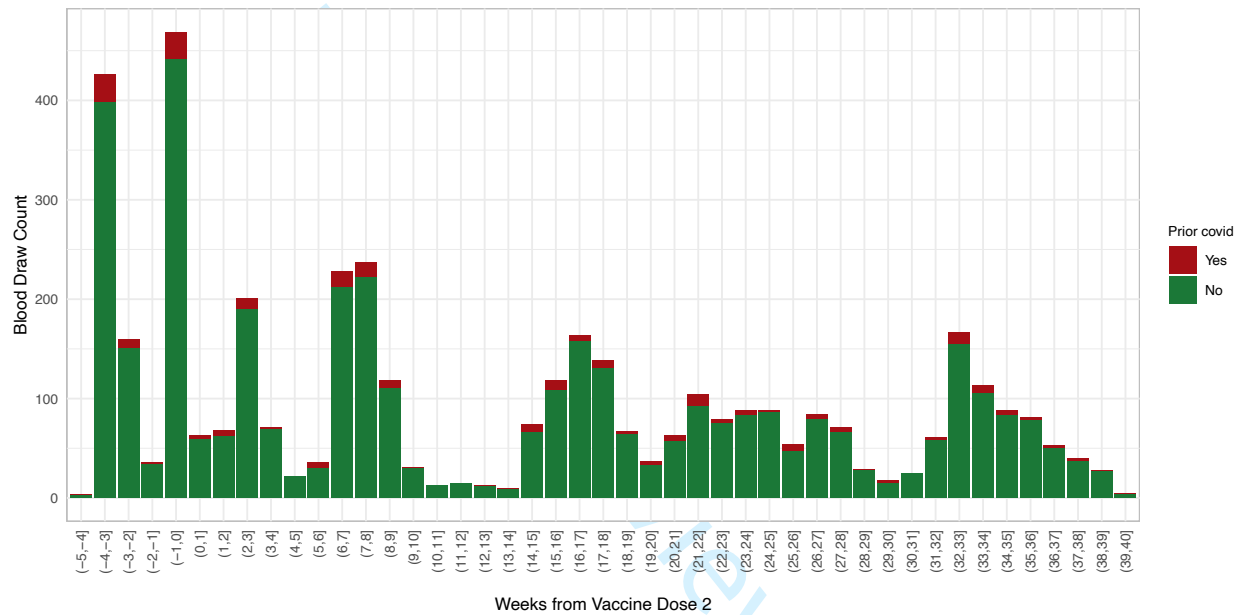

**B.**

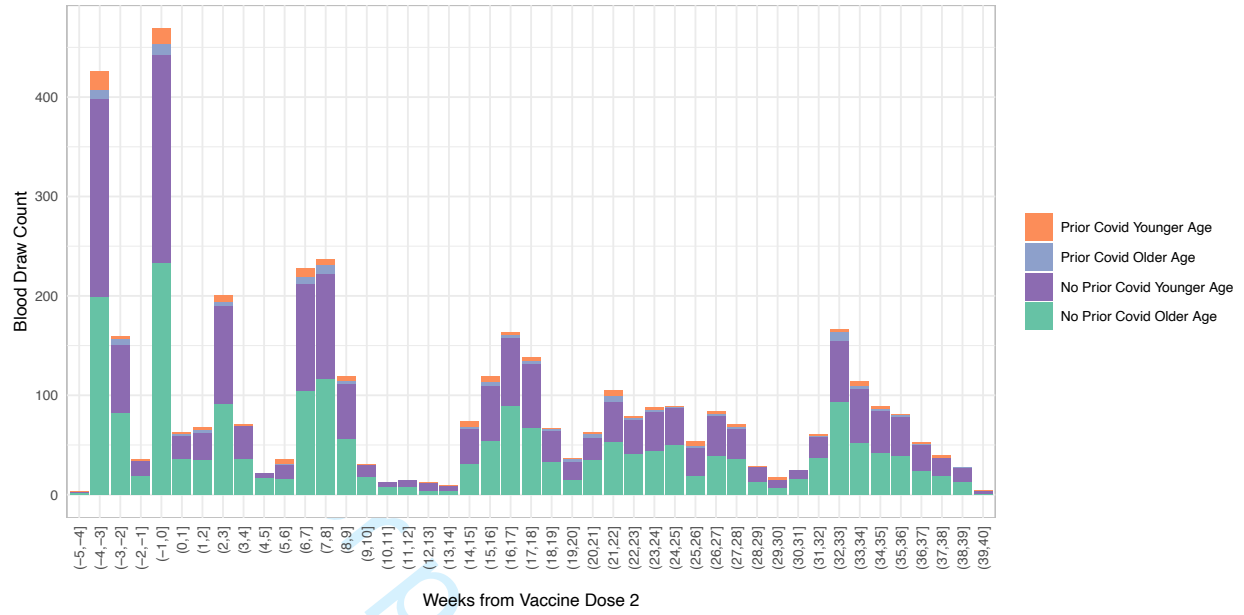

C.

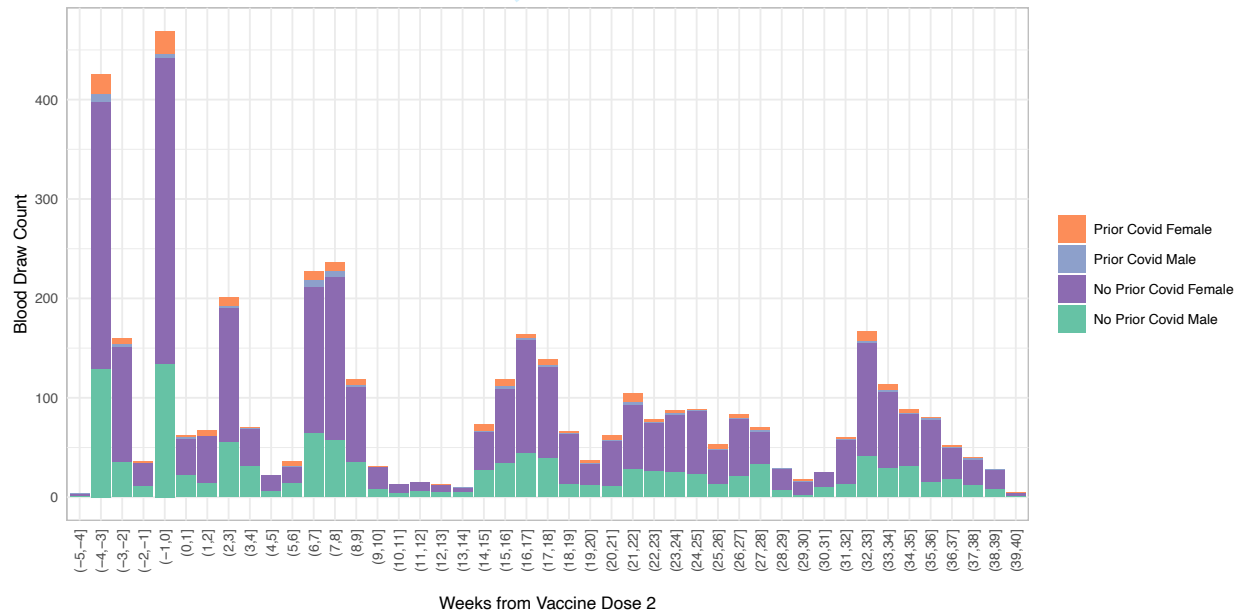

D.



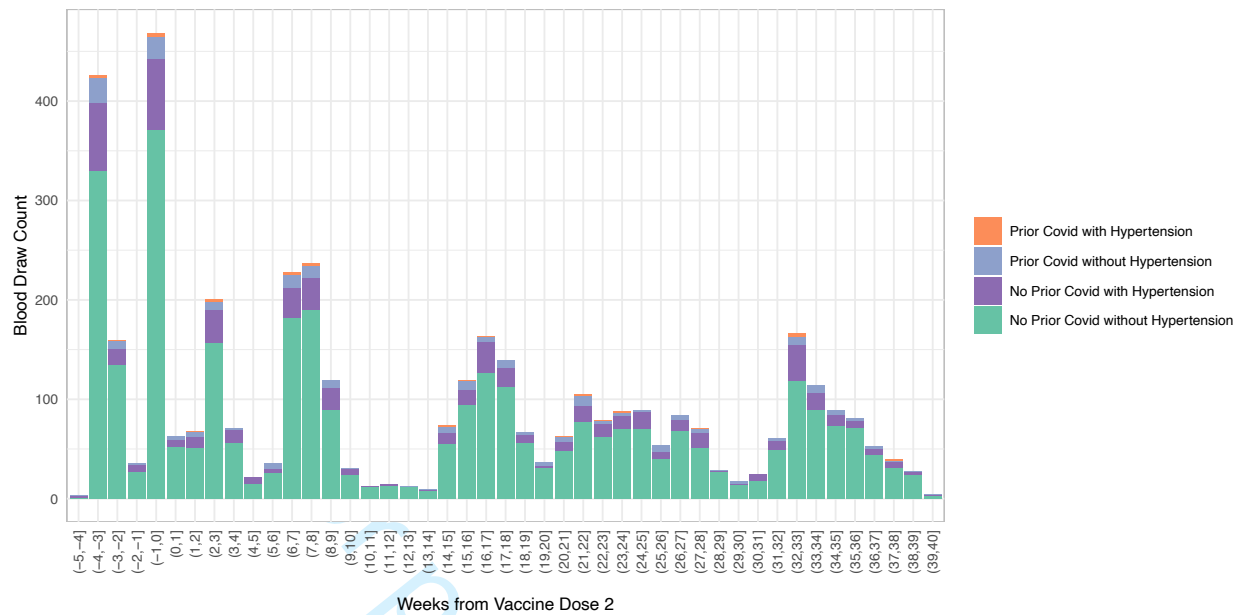

Peer review only

**Supplemental Table 3. Clinical and demographic correlates of longitudinal anti-spike IgG antibody response following complete initial mRNA vaccination, including interaction terms for A) age and prior SARS-CoV-2 infection, B) sex and prior SARS-CoV-2 infection, C) hypertension and prior SARS-CoV-2 infection, and D) age and sex.**

**A.**

|                                         | Beta* | SE   | P      | Partial r2 |
|-----------------------------------------|-------|------|--------|------------|
| Prior SARS-CoV-2 infection              | 1.58  | 0.14 | <0.001 | 0.069      |
| Older age†                              | -0.29 | 0.06 | <0.001 | 0.016      |
| Prior SARS-CoV-2 infection : Older age† | 0.37  | 0.23 | 0.10   | 0.002      |
| Male sex                                | -0.28 | 0.06 | <0.001 | 0.014      |
| Hypertension                            | -0.21 | 0.08 | 0.008  | 0.005      |

**B.**

|                                       | Beta* | SE   | P      | Partial r2 |
|---------------------------------------|-------|------|--------|------------|
| Prior SARS-CoV-2 infection            | 1.86  | 0.13 | <0.001 | 0.115      |
| Age                                   | -0.01 | 0.00 | <0.001 | 0.019      |
| Male sex                              | -0.24 | 0.06 | <0.001 | 0.010      |
| Prior SARS-CoV-2 infection : Male sex | -0.42 | 0.25 | 0.08   | 0.002      |
| Hypertension                          | -0.18 | 0.08 | 0.034  | 0.003      |

**C.**

|                                           | Beta* | SE   | P      | Partial r2 |
|-------------------------------------------|-------|------|--------|------------|
| Prior SARS-CoV-2 infection                | 1.61  | 0.12 | <0.001 | 0.105      |
| Age                                       | -0.01 | 0.00 | <0.001 | 0.019      |
| Male sex                                  | -0.27 | 0.06 | <0.001 | 0.013      |
| Hypertension                              | -0.23 | 0.08 | 0.005  | 0.005      |
| Prior SARS-CoV-2 infection : Hypertension | 1.17  | 0.35 | 0.001  | 0.008      |

## D.

|                                                   | Beta* | SE   | P      | Partial r2 |
|---------------------------------------------------|-------|------|--------|------------|
| Prior SARS-CoV-2 infection                        | 1.72  | 0.11 | <0.001 | 0.133      |
| Older Age†                                        | -0.20 | 0.07 | 0.005  | 0.005      |
| Male sex                                          | -0.15 | 0.09 | 0.11   | 0.002      |
| Older Age† x Male sex ( <i>interaction term</i> ) | -0.25 | 0.12 | 0.043  | 0.003      |
| Hypertension                                      | -0.22 | 0.08 | 0.007  | 0.005      |

\*Beta values represent increase in 1-SD of log(10)IgG-S level per presence (vs absence) of a categorical variable or per unit increment of continuous variable).

† Older age defined as age greater than the median age of the cohort (41.7 years).

1  
2  
3  
4  
5  
6  
7  
8  
9  
10  
11  
12  
13  
14  
15  
16  
17  
18  
19  
20  
21  
22  
23  
24  
25  
26  
27  
28  
29  
30  
31  
32  
33  
34  
35  
36  
37  
38  
39  
40  
41  
42  
43  
44  
45  
46  
47

**Supplemental Table 4. Correlates of longitudinal anti-spike IgG antibody response following complete initial mRNA vaccination, stratified by prior SARS-CoV-2 infection status.**

|              | No Prior SARS-CoV-2 Infection<br>N=784 |      |        | Prior SARS-CoV-2 Infection<br>N=59 |      |       |
|--------------|----------------------------------------|------|--------|------------------------------------|------|-------|
|              | Beta*                                  | SE   | P      | Beta*                              | SE   | P     |
| Age, year    | -0.01                                  | 0.00 | <0.001 | -0.00                              | 0.01 | 0.74  |
| Male sex     | -0.24                                  | 0.06 | <0.001 | -0.72                              | 0.33 | 0.032 |
| Hypertension | -0.23                                  | 0.08 | 0.005  | 0.96                               | 0.50 | 0.06  |

\*Beta values represent increase in 1-SD of log(10)IgG-S level per presence (vs absence) of a categorical variable or per unit increment of continuous variable), in analyses adjusted for age, sex, and hypertension.

**Supplemental Table 5. Association of prior SARS-CoV-2 infection with longitudinal anti-spike IgG antibody response following complete initial mRNA vaccination, stratified by age, sex, and hypertension status.**

**A.**

|                            | Age <42 years<br>N=421 |      |        | Age ≥42 years<br>N=422 |      |        |
|----------------------------|------------------------|------|--------|------------------------|------|--------|
|                            | Beta*                  | SE   | P      | Beta*                  | SE   | P      |
| Prior SARS-CoV-2 infection | 1.57                   | 0.13 | <0.001 | 1.93                   | 0.19 | <0.001 |

\*Beta values represent increase in 1-SD of log(10)IgG-S level per presence (vs absence) of a categorical variable or per unit increment of continuous variable), in analyses adjusted sex and hypertension.

**B.**

|                            | Males<br>N=256 |      |        | Females<br>N=587 |      |        |
|----------------------------|----------------|------|--------|------------------|------|--------|
|                            | Beta*          | SE   | P      | Beta*            | SE   | P      |
| Prior SARS-CoV-2 infection | 1.35           | 0.20 | <0.001 | 1.86             | 0.13 | <0.001 |

\*Beta values represent increase in 1-SD of log(10)IgG-S level per presence (vs absence) of a categorical variable or per unit increment of continuous variable), in analyses adjusted for age and hypertension.

**C.**

|                            | No Hypertension<br>N=715 |      |        | Hypertension<br>N=128 |      |        |
|----------------------------|--------------------------|------|--------|-----------------------|------|--------|
|                            | Beta*                    | SE   | P      | Beta*                 | SE   | P      |
| Prior SARS-CoV-2 infection | 1.61                     | 0.11 | <0.001 | 2.77                  | 0.43 | <0.001 |

\*Beta values represent increase in 1-SD of log(10)IgG-S level per presence (vs absence) of a categorical variable or per unit increment of continuous variable), in analyses adjusted for age and sex.

1  
2  
3  
4  
5  
6  
7  
8  
9  
10  
11  
12  
13  
14  
15  
16  
17  
18  
19  
20  
21  
22  
23  
24  
25  
26  
27  
28  
29  
30  
31  
32  
33  
34  
35  
36  
37  
38  
39  
40  
41  
42  
43  
44  
45  
46  
47  
48  
49  
50  
51  
52  
53  
54  
55  
56  
57  
58  
59  
60

## STROBE Statement—checklist of items that should be included in reports of observational studies

|                              | Item No | Recommendation                                                                                                                                                                                                                                                                                                                                                                                                                                                         | Page No |
|------------------------------|---------|------------------------------------------------------------------------------------------------------------------------------------------------------------------------------------------------------------------------------------------------------------------------------------------------------------------------------------------------------------------------------------------------------------------------------------------------------------------------|---------|
| <b>Title and abstract</b>    | 1       | (a) Indicate the study's design with a commonly used term in the title or the abstract                                                                                                                                                                                                                                                                                                                                                                                 | 3       |
|                              |         | (b) Provide in the abstract an informative and balanced summary of what was done and what was found                                                                                                                                                                                                                                                                                                                                                                    | 3       |
| <b>Introduction</b>          |         |                                                                                                                                                                                                                                                                                                                                                                                                                                                                        |         |
| Background/rationale         | 2       | Explain the scientific background and rationale for the investigation being reported                                                                                                                                                                                                                                                                                                                                                                                   | 6       |
| Objectives                   | 3       | State specific objectives, including any prespecified hypotheses                                                                                                                                                                                                                                                                                                                                                                                                       | 6       |
| <b>Methods</b>               |         |                                                                                                                                                                                                                                                                                                                                                                                                                                                                        |         |
| Study design                 | 4       | Present key elements of study design early in the paper                                                                                                                                                                                                                                                                                                                                                                                                                | 7       |
| Setting                      | 5       | Describe the setting, locations, and relevant dates, including periods of recruitment, exposure, follow-up, and data collection                                                                                                                                                                                                                                                                                                                                        | 7       |
| Participants                 | 6       | (a) <i>Cohort study</i> —Give the eligibility criteria, and the sources and methods of selection of participants. Describe methods of follow-up<br><i>Case-control study</i> —Give the eligibility criteria, and the sources and methods of case ascertainment and control selection. Give the rationale for the choice of cases and controls<br><i>Cross-sectional study</i> —Give the eligibility criteria, and the sources and methods of selection of participants | 7       |
|                              |         | (b) <i>Cohort study</i> —For matched studies, give matching criteria and number of exposed and unexposed<br><i>Case-control study</i> —For matched studies, give matching criteria and the number of controls per case                                                                                                                                                                                                                                                 | NA      |
| Variables                    | 7       | Clearly define all outcomes, exposures, predictors, potential confounders, and effect modifiers. Give diagnostic criteria, if applicable                                                                                                                                                                                                                                                                                                                               | 7       |
| Data sources/<br>measurement | 8*      | For each variable of interest, give sources of data and details of methods of assessment (measurement). Describe comparability of assessment methods if there is more than one group                                                                                                                                                                                                                                                                                   | 7       |
| Bias                         | 9       | Describe any efforts to address potential sources of bias                                                                                                                                                                                                                                                                                                                                                                                                              | 8       |
| Study size                   | 10      | Explain how the study size was arrived at                                                                                                                                                                                                                                                                                                                                                                                                                              | 7       |
| Quantitative variables       | 11      | Explain how quantitative variables were handled in the analyses. If applicable, describe which groupings were chosen and why                                                                                                                                                                                                                                                                                                                                           | 8       |
| Statistical methods          | 12      | (a) Describe all statistical methods, including those used to control for confounding                                                                                                                                                                                                                                                                                                                                                                                  | 8       |
|                              |         | (b) Describe any methods used to examine subgroups and interactions                                                                                                                                                                                                                                                                                                                                                                                                    | 8       |
|                              |         | (c) Explain how missing data were addressed                                                                                                                                                                                                                                                                                                                                                                                                                            | NA      |
|                              |         | (d) <i>Cohort study</i> —If applicable, explain how loss to follow-up was addressed<br><i>Case-control study</i> —If applicable, explain how matching of cases and controls was addressed<br><i>Cross-sectional study</i> —If applicable, describe analytical methods taking account of sampling strategy                                                                                                                                                              | NA      |
|                              |         | (e) Describe any sensitivity analyses                                                                                                                                                                                                                                                                                                                                                                                                                                  | 8       |

Continued on next page

| <b>Results</b>           |     |                                                                                                                                                                                                              |       |
|--------------------------|-----|--------------------------------------------------------------------------------------------------------------------------------------------------------------------------------------------------------------|-------|
| Participants             | 13* | (a) Report numbers of individuals at each stage of study—eg numbers potentially eligible, examined for eligibility, confirmed eligible, included in the study, completing follow-up, and analysed            | 7     |
|                          |     | (b) Give reasons for non-participation at each stage                                                                                                                                                         | NA    |
|                          |     | (c) Consider use of a flow diagram                                                                                                                                                                           | NA    |
| Descriptive data         | 14* | (a) Give characteristics of study participants (eg demographic, clinical, social) and information on exposures and potential confounders                                                                     | 9     |
|                          |     | (b) Indicate number of participants with missing data for each variable of interest                                                                                                                          | NA    |
|                          |     | (c) <i>Cohort study</i> —Summarise follow-up time (eg, average and total amount)                                                                                                                             | 8     |
| Outcome data             | 15* | <i>Cohort study</i> —Report numbers of outcome events or summary measures over time                                                                                                                          | 9     |
|                          |     | <i>Case-control study</i> —Report numbers in each exposure category, or summary measures of exposure                                                                                                         | NA    |
|                          |     | <i>Cross-sectional study</i> —Report numbers of outcome events or summary measures                                                                                                                           | NA    |
| Main results             | 16  | (a) Give unadjusted estimates and, if applicable, confounder-adjusted estimates and their precision (eg, 95% confidence interval). Make clear which confounders were adjusted for and why they were included | 9     |
|                          |     | (b) Report category boundaries when continuous variables were categorized                                                                                                                                    | NA    |
|                          |     | (c) If relevant, consider translating estimates of relative risk into absolute risk for a meaningful time period                                                                                             | 9     |
| Other analyses           | 17  | Report other analyses done—eg analyses of subgroups and interactions, and sensitivity analyses                                                                                                               | 9-10  |
| <b>Discussion</b>        |     |                                                                                                                                                                                                              |       |
| Key results              | 18  | Summarise key results with reference to study objectives                                                                                                                                                     | 11    |
| Limitations              | 19  | Discuss limitations of the study, taking into account sources of potential bias or imprecision. Discuss both direction and magnitude of any potential bias                                                   | 13-14 |
| Interpretation           | 20  | Give a cautious overall interpretation of results considering objectives, limitations, multiplicity of analyses, results from similar studies, and other relevant evidence                                   | 14    |
| Generalisability         | 21  | Discuss the generalisability (external validity) of the study results                                                                                                                                        | 13-14 |
| <b>Other information</b> |     |                                                                                                                                                                                                              |       |
| Funding                  | 22  | Give the source of funding and the role of the funders for the present study and, if applicable, for the original study on which the present article is based                                                | 16    |

\*Give information separately for cases and controls in case-control studies and, if applicable, for exposed and unexposed groups in cohort and cross-sectional studies.

**Note:** An Explanation and Elaboration article discusses each checklist item and gives methodological background and published examples of transparent reporting. The STROBE checklist is best used in conjunction with this article (freely available on the Web sites of PLoS Medicine at <http://www.plosmedicine.org/>, Annals of Internal Medicine at <http://www.annals.org/>, and Epidemiology at <http://www.epidem.com/>). Information on the STROBE Initiative is available at [www.strobe-statement.org](http://www.strobe-statement.org).
