# Supplementary material for: Demographic and clinical characteristics associated with variations in antibody response to BNT162b2 COVID-19 vaccination among healthcare workers at an academic medical centre: a longitudinal cohort analysis
Source: PubMed Central journal article supplement — BMJ Open. 2022 May 23;12(5):e059994. doi: 10.1136/bmjopen-2021-059994 (PMC9130668; doi:10.1136/bmjopen-2021-059994), 2022-05-23
Supplement: bmjopen-2021-059994supp001.pdf [file bmjopen-2021-059994supp001.pdf]

**Longitudinal Cohort Analysis of Demographic and Clinical Characteristics Associated  
with Variations in Antibody Response to BNT162b2 Vaccination Among Healthcare  
Workers at an Academic Medical Center**

*Supplemental Material*

|                             |   |
|-----------------------------|---|
| Supplemental Table 1 .....  | 2 |
| Supplemental Table 2 .....  | 3 |
| Supplemental Figure 1 ..... | 4 |
| Supplemental Table 3 .....  | 6 |
| Supplemental Table 4 .....  | 8 |
| Supplemental Table 5 .....  | 9 |

*Correspondence:*

Joseph Ebinger, MD, MS, Department of Cardiology, Smidt Heart Institute, Cedars-Sinai Medical Center, Los Angeles, CA, phone (310) 423-0925, email [joseph.ebinger@csmc.edu](mailto:joseph.ebinger@csmc.edu);

Susan Cheng, MD, MPH, Department of Cardiology, Smidt Heart Institute, Cedars-Sinai Medical Center, Los Angeles, CA, phone (310) 423-2726, email [susan.cheng@cshs.org](mailto:susan.cheng@cshs.org); Kimia

Sobhani, PhD, Department of Pathology and Laboratory Medicine, Cedars-Sinai Medical Center, Los Angeles, CA, phone (310) 423-5405, email [kimia.sobhani@cshs.org](mailto:kimia.sobhani@cshs.org).

**Supplemental Table 1:** Comparison of characteristics between the included and excluded study samples.

|                             | Total Sample<br>N=1703 | Included<br>N=843 | Excluded<br>N=860    | P      |
|-----------------------------|------------------------|-------------------|----------------------|--------|
| Age in years, median [IQR]  | 39.90 [33.59, 51.06]   | 41.7 [35.2, 52.8] | 38.01 [32.41, 49.51] | <0.001 |
| Male sex, n (%)             | 539 (31.7)             | 256 (30.4)        | 283 (32.9)           | 0.283  |
| Non-white race, n (%)       | 879 (51.6)             | 405 (48.0)        | 474 (55.1)           | 0.004  |
| Hispanic ethnicity, n (%)   | 224 (13.2)             | 86 (10.2)         | 138 (16.0)           | <0.001 |
| Obesity                     | 252 (14.8)             | 103 (12.2)        | 149 (17.3)*          | 0.004  |
| Hypertension                | 243 (14.3)             | 128 (15.2)        | 115 (13.4)*          | 0.318  |
| Charlson comorbidity index† | 0.00 [0.00, 0.00]      | 0.0 [0.0, 1.0]    | 0.00 [0.00, 0.00]*   | 0.009  |

\*The data shown are for the 846 excluded participants who had medical history data available for ascertaining these clinical characteristics (i.e. obesity, hypertension, and Charlson comorbidity index).

†The Charlson comorbidity index weights the clinical conditions into a single score to predict 10-year survival: age, myocardial infarction, heart failure, peripheral vascular disease, stroke, dementia, chronic obstructive pulmonary disease, connective tissue disease, peptic ulcer disease, liver disease, diabetes mellitus, hemiplegia, chronic kidney disease, solid tumor, leukemia, lymphoma and AIDS.

**Supplemental Table 2. Comparison of characteristics between the older and younger study participants.**

|                            | Total Sample<br>N=843 | Younger Age*<br>N=421 | Older Age*<br>N=422  | P      |
|----------------------------|-----------------------|-----------------------|----------------------|--------|
| Age in years, median [IQR] | 41.66 [35.19, 52.80]  | 35.19 [31.55, 38.02]  | 52.80 [46.66, 62.25] | <0.001 |
| Male sex, n (%)            | 256 (30.4)            | 105 (24.9)            | 151 (35.8)           | 0.001  |
| Non-white race, n (%)      | 405 (48.0)            | 224 (53.2)            | 181 (42.9)           | 0.003  |
| Hispanic ethnicity, n (%)  | 86 (10.2)             | 59 (14.0)             | 27 (6.4)             | <0.001 |
| Obesity                    | 103 (12.2)            | 43 (10.2)             | 60 (14.2)            | 0.095  |
| Hypertension               | 128 (15.2)            | 21 (5.0)              | 107 (25.4)           | <0.001 |
| Charlson comorbidity index | 0.00 [0.00, 1.00]     | 0.00 [0.00, 0.00]     | 0.00 [0.00, 1.00]    | <0.001 |

\*Age definition based on if participant was younger or older in age than the median cohort age of 41.7 years.

**Supplemental Figure 1. Number of available blood samples at each time point, stratified by prior COVID-19 status A) alone, or in combination with B) age, C) sex, and D) hypertension.**

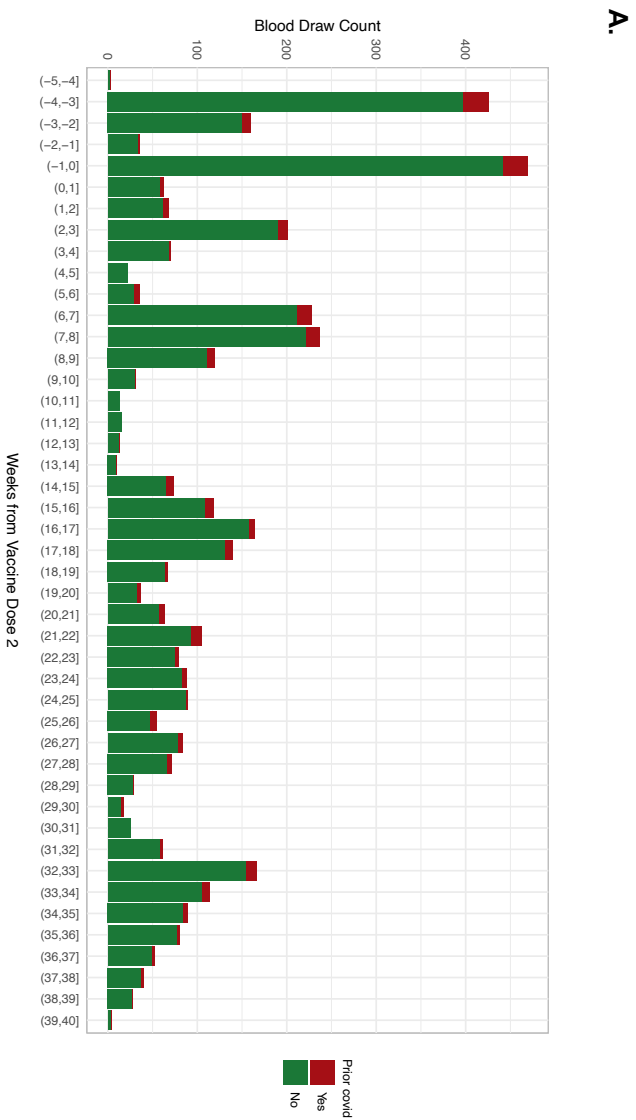

**B.**

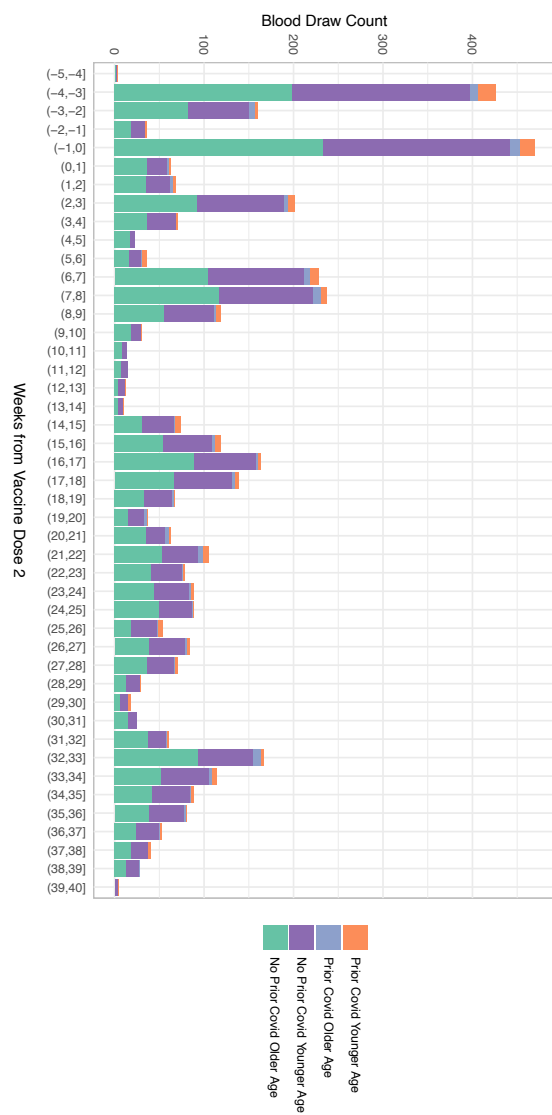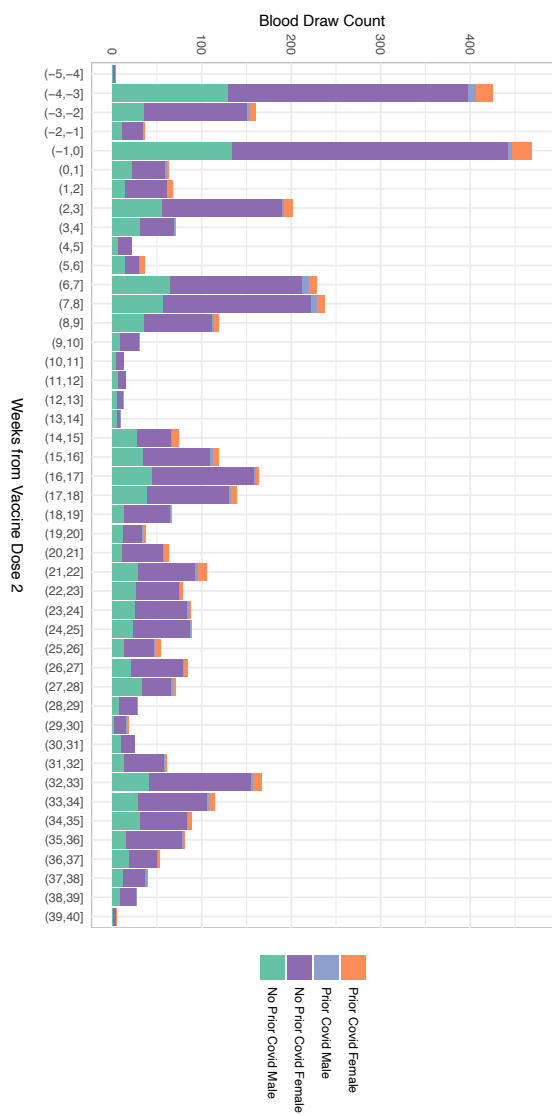

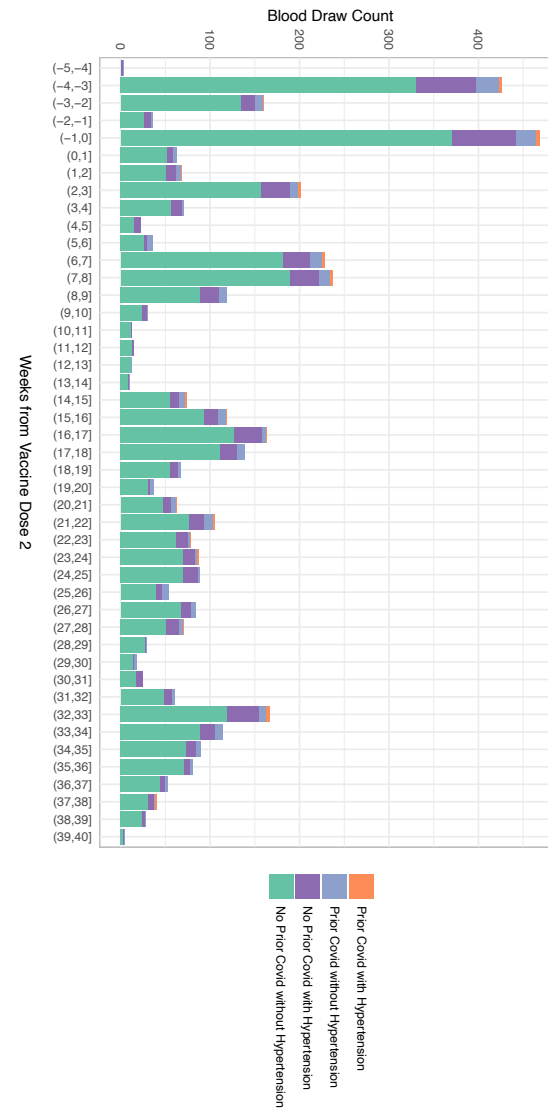

**Supplemental Table 3. Clinical and demographic correlates of longitudinal anti-spike IgG antibody response following complete initial mRNA vaccination, including interaction terms for A) age and prior SARS-CoV-2 infection, B) sex and prior SARS-CoV-2 infection, C) hypertension and prior SARS-CoV-2 infection, and D) age and sex.**

**A.**

|                                         | Beta* | SE   | P      | Partial r2 |
|-----------------------------------------|-------|------|--------|------------|
| Prior SARS-CoV-2 infection              | 1.58  | 0.14 | <0.001 | 0.069      |
| Older age†                              | -0.29 | 0.06 | <0.001 | 0.016      |
| Prior SARS-CoV-2 infection : Older age† | 0.37  | 0.23 | 0.10   | 0.002      |
| Male sex                                | -0.28 | 0.06 | <0.001 | 0.014      |
| Hypertension                            | -0.21 | 0.08 | 0.008  | 0.005      |

**B.**

|                                       | Beta* | SE   | P      | Partial r2 |
|---------------------------------------|-------|------|--------|------------|
| Prior SARS-CoV-2 infection            | 1.86  | 0.13 | <0.001 | 0.115      |
| Age                                   | -0.01 | 0.00 | <0.001 | 0.019      |
| Male sex                              | -0.24 | 0.06 | <0.001 | 0.010      |
| Prior SARS-CoV-2 infection : Male sex | -0.42 | 0.25 | 0.08   | 0.002      |
| Hypertension                          | -0.18 | 0.08 | 0.034  | 0.003      |

**C.**

|                                           | Beta* | SE   | P      | Partial r2 |
|-------------------------------------------|-------|------|--------|------------|
| Prior SARS-CoV-2 infection                | 1.61  | 0.12 | <0.001 | 0.105      |
| Age                                       | -0.01 | 0.00 | <0.001 | 0.019      |
| Male sex                                  | -0.27 | 0.06 | <0.001 | 0.013      |
| Hypertension                              | -0.23 | 0.08 | 0.005  | 0.005      |
| Prior SARS-CoV-2 infection : Hypertension | 1.17  | 0.35 | 0.001  | 0.008      |

**D.**

|                                                   | Beta* | SE   | P      | Partial r2 |
|---------------------------------------------------|-------|------|--------|------------|
| Prior SARS-CoV-2 infection                        | 1.72  | 0.11 | <0.001 | 0.133      |
| Older Age†                                        | -0.20 | 0.07 | 0.005  | 0.005      |
| Male sex                                          | -0.15 | 0.09 | 0.11   | 0.002      |
| Older Age† x Male sex ( <i>interaction term</i> ) | -0.25 | 0.12 | 0.043  | 0.003      |
| Hypertension                                      | -0.22 | 0.08 | 0.007  | 0.005      |

\*Beta values represent increase in 1-SD of log(10)IgG-S level per presence (vs absence) of a categorical variable or per unit increment of continuous variable).

† Older age defined as age greater than the median age of the cohort (41.7 years).



**Supplemental Table 4. Correlates of longitudinal anti-spike IgG antibody response following complete initial mRNA vaccination, stratified by prior SARS-CoV-2 infection status.**

|              | No Prior SARS-CoV-2 Infection<br>N=784 |      |        | Prior SARS-CoV-2 Infection<br>N=59 |      |       |
|--------------|----------------------------------------|------|--------|------------------------------------|------|-------|
|              | Beta*                                  | SE   | P      | Beta*                              | SE   | P     |
| Age, year    | -0.01                                  | 0.00 | <0.001 | -0.00                              | 0.01 | 0.74  |
| Male sex     | -0.24                                  | 0.06 | <0.001 | -0.72                              | 0.33 | 0.032 |
| Hypertension | -0.23                                  | 0.08 | 0.005  | 0.96                               | 0.50 | 0.06  |

\*Beta values represent increase in 1-SD of log(10)IgG-S level per presence (vs absence) of a categorical variable or per unit increment of continuous variable), in analyses adjusted for age, sex, and hypertension.

**Supplemental Table 5. Association of prior SARS-CoV-2 infection with longitudinal anti-spike IgG antibody response following complete initial mRNA vaccination, stratified by age, sex, and hypertension status.**

**A.**

|                            | Age <42 years<br>N=421 |      |        | Age ≥42 years<br>N=422 |      |        |
|----------------------------|------------------------|------|--------|------------------------|------|--------|
|                            | Beta*                  | SE   | P      | Beta*                  | SE   | P      |
| Prior SARS-CoV-2 infection | 1.57                   | 0.13 | <0.001 | 1.93                   | 0.19 | <0.001 |

\*Beta values represent increase in 1-SD of log(10)IgG-S level per presence (vs absence) of a categorical variable or per unit increment of continuous variable), in analyses adjusted sex and hypertension.

**B.**

|                            | Males<br>N=256 |      |        | Females<br>N=587 |      |        |
|----------------------------|----------------|------|--------|------------------|------|--------|
|                            | Beta*          | SE   | P      | Beta*            | SE   | P      |
| Prior SARS-CoV-2 infection | 1.35           | 0.20 | <0.001 | 1.86             | 0.13 | <0.001 |

\*Beta values represent increase in 1-SD of log(10)IgG-S level per presence (vs absence) of a categorical variable or per unit increment of continuous variable), in analyses adjusted for age and hypertension.

**C.**

|                            | No Hypertension<br>N=715 |      |        | Hypertension<br>N=128 |      |        |
|----------------------------|--------------------------|------|--------|-----------------------|------|--------|
|                            | Beta*                    | SE   | P      | Beta*                 | SE   | P      |
| Prior SARS-CoV-2 infection | 1.61                     | 0.11 | <0.001 | 2.77                  | 0.43 | <0.001 |

\*Beta values represent increase in 1-SD of log(10)IgG-S level per presence (vs absence) of a categorical variable or per unit increment of continuous variable), in analyses adjusted for age and sex.
